# Supplementary material for: Nitrogen positional scanning in tetramines active against HIV-1 as potential CXCR4 inhibitors
Source: Royal Society of Chemistry journal article supplement (doi:10.1039/c5ob02419f), 2015-12-10
Supplement: c5ob02419f1.pdf [file c5ob02419f1.pdf]

## Supporting Information

# Nitrogen positional scanning in tetramines active against HIV-1 as potential CXCR4 inhibitors

Raimon Puig de la Bellacasa,<sup>a</sup> Albert Gibert,<sup>a</sup> Jesús M. Planesas,<sup>a</sup> Laia Ros-Blanco,<sup>a</sup> Xavier Batllori,<sup>a</sup> Roger Badía,<sup>b</sup> Bonaventura Clotet,<sup>b</sup> José Esté,<sup>b</sup> Jordi Teixidó<sup>a</sup> and José I. Borrell<sup>\*a</sup>

<sup>[a]</sup> *Grup d'Enginyeria Molecular, Institut Químic de Sarrià, Universitat Ramon Llull, Via*

*Augusta, 390, E-08017 Barcelona, Spain*

<sup>[b]</sup> *AIDS Research Institute IrsiCaixa, Hospital Universitari Germans Trias i Pujol, Universitat*

*Autonoma de Barcelona, 08916 Badalona, Spain*

*j.i.borrell@iqs.url.edu*

### Table of contents:

Spectra

S2

\* Corresponding author j.i.borrell@iqs.url.edu; Tel: +34-932 672 059; Fax: +34-932 056 266.

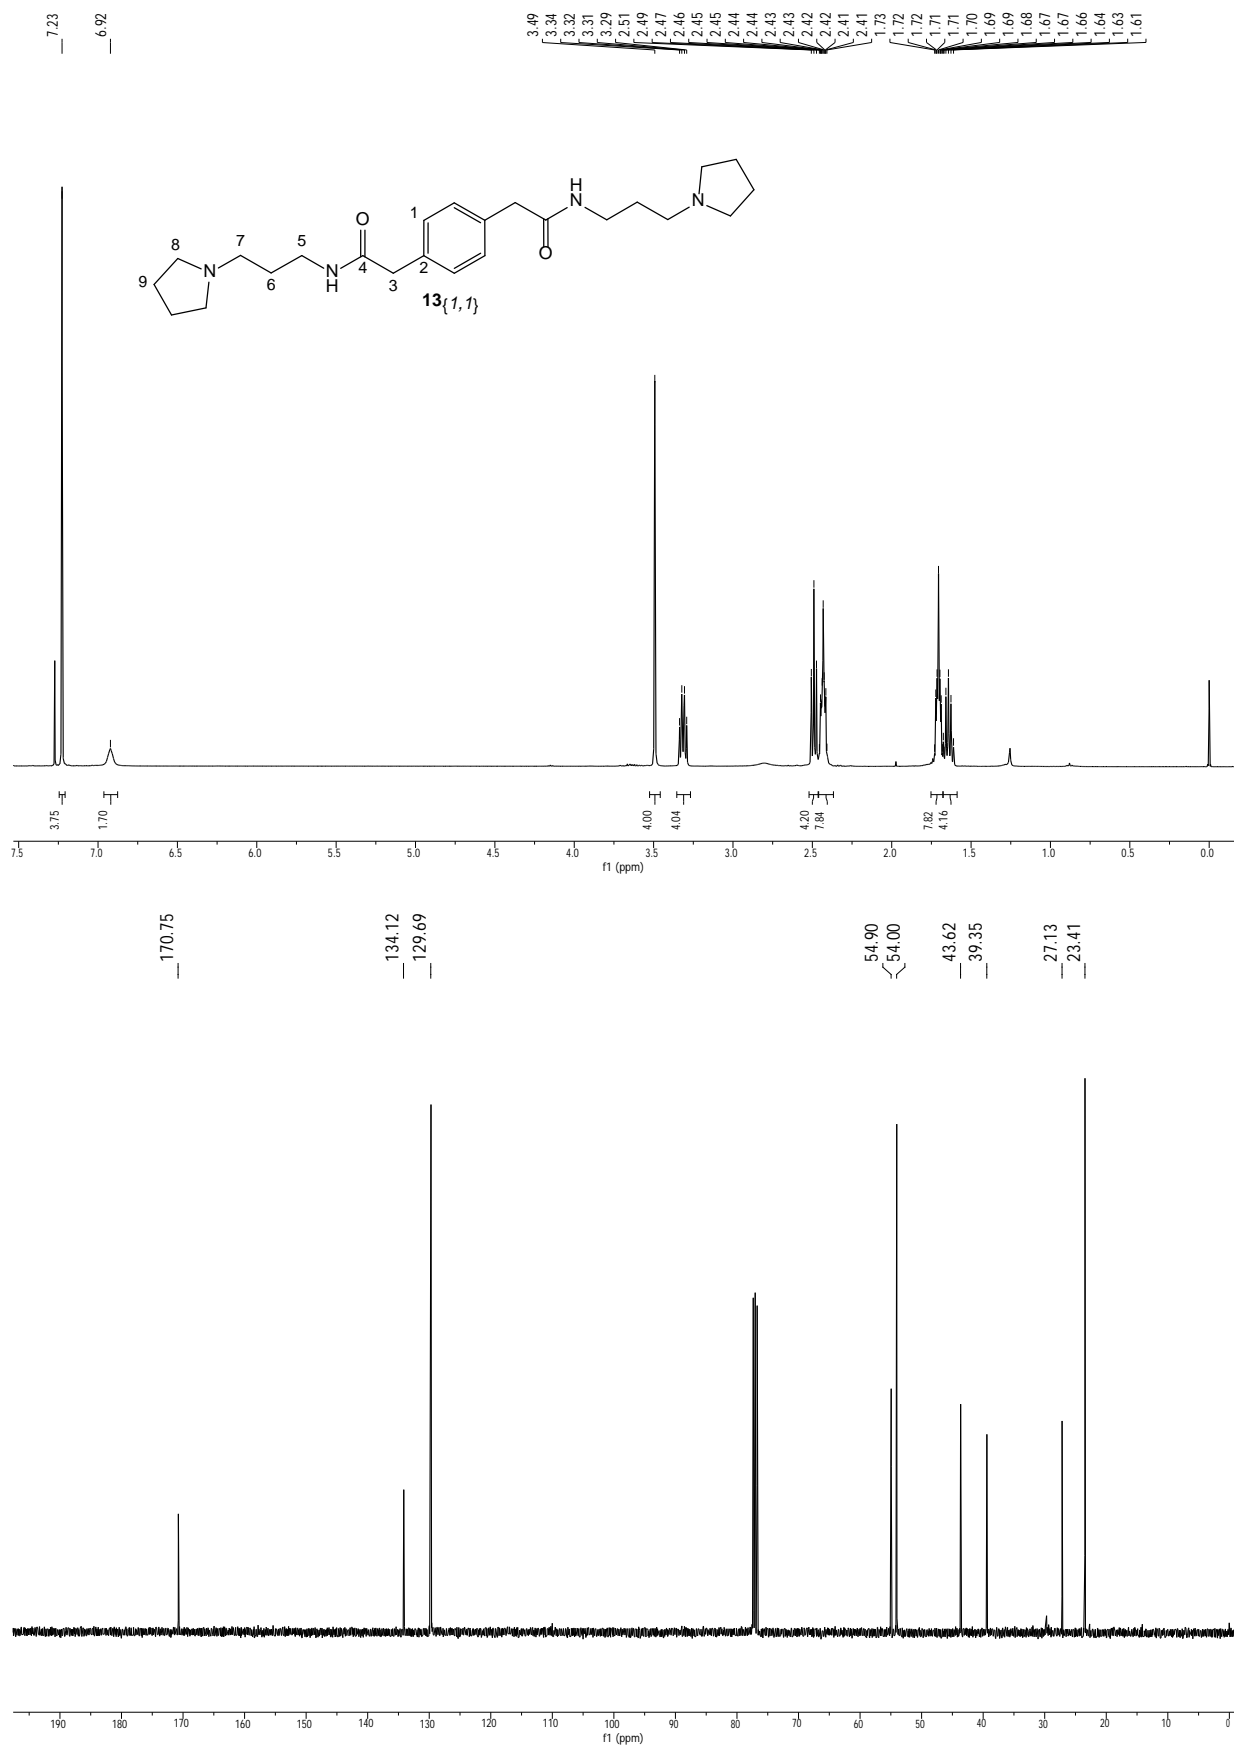

**Fig. S-1:** <sup>1</sup>H and <sup>13</sup>C-NMR of *N,N'*-bis(3-(pyrrolidin-1-yl)propyl)-1,4-di(amino-carbonylmethyl)benzene (**13{I,I}**).

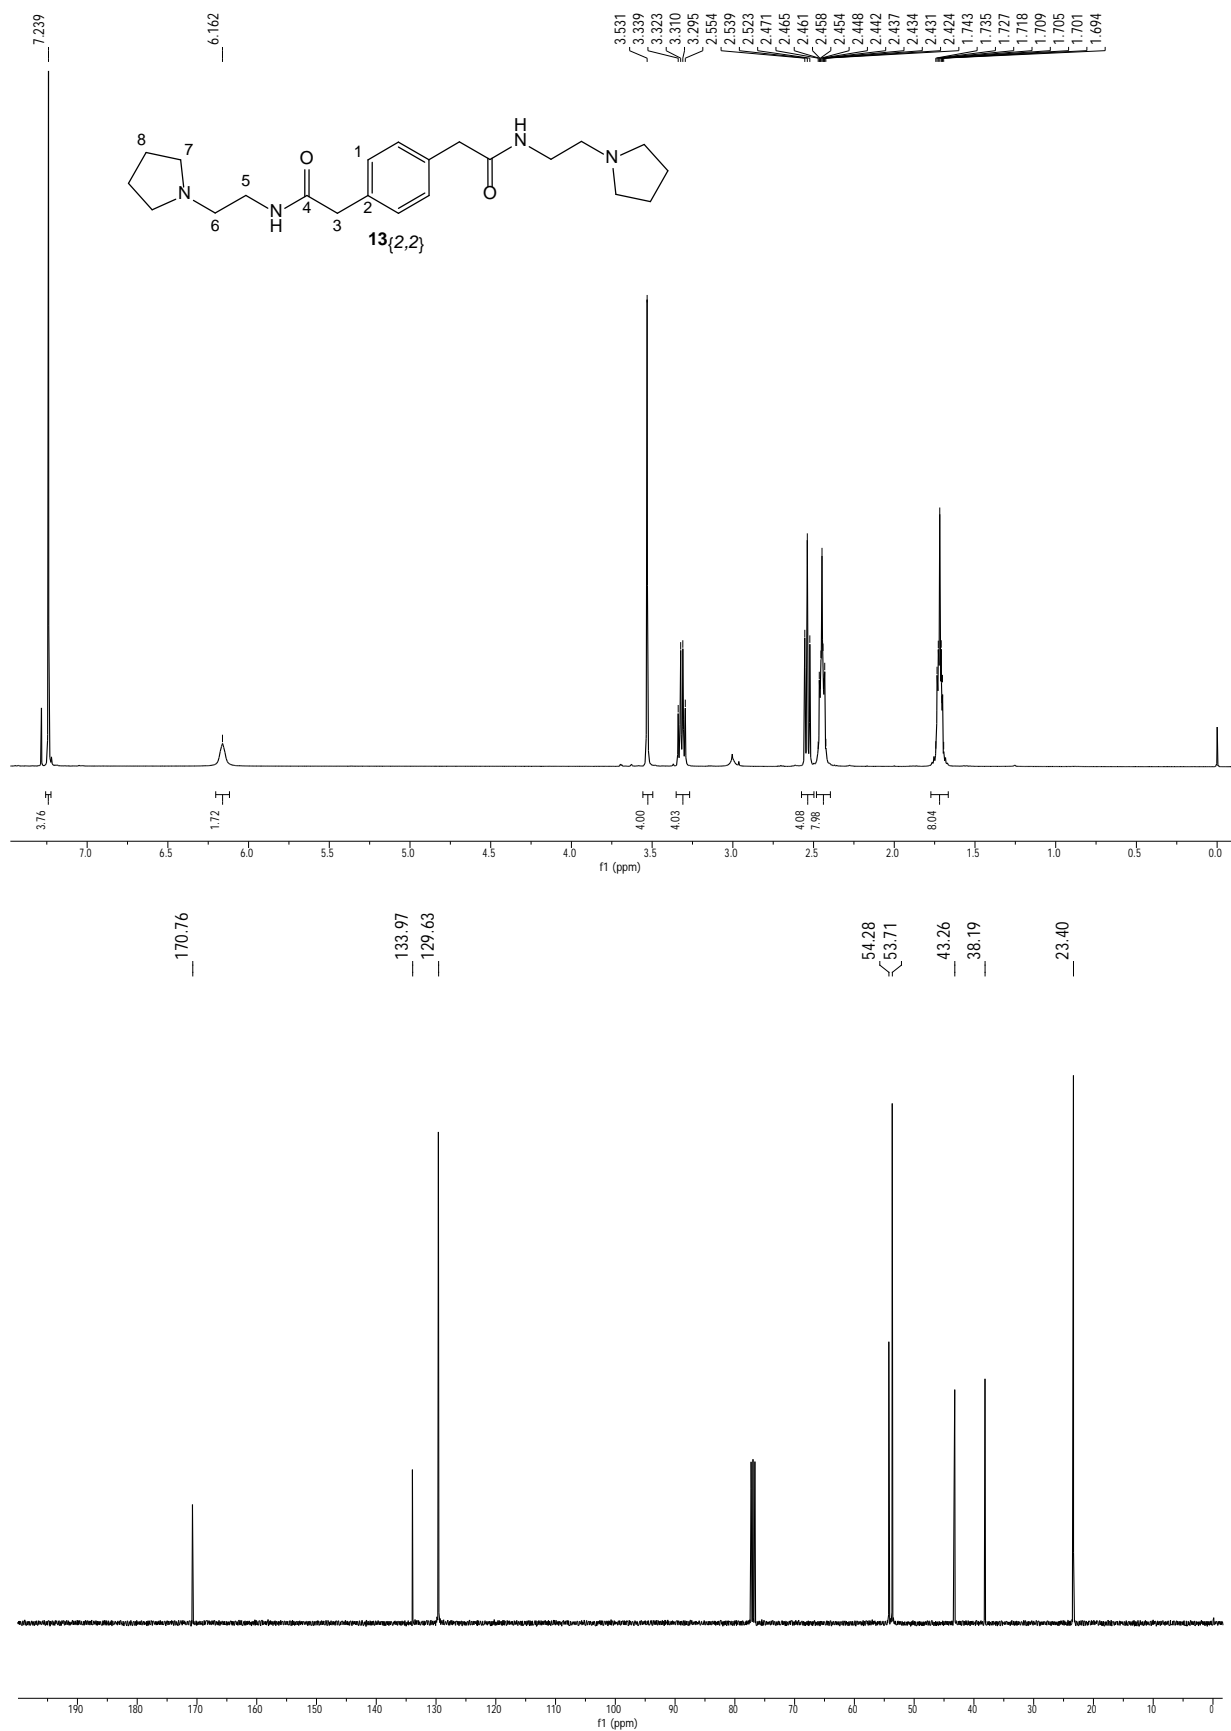

**Fig. S-2:** <sup>1</sup>H and <sup>13</sup>C-NMR of *N,N'*-bis(2-(pyrrolidin-1-yl)ethyl)-1,4-di(aminocarbonylmethyl)benzene (**13**{2,2}).

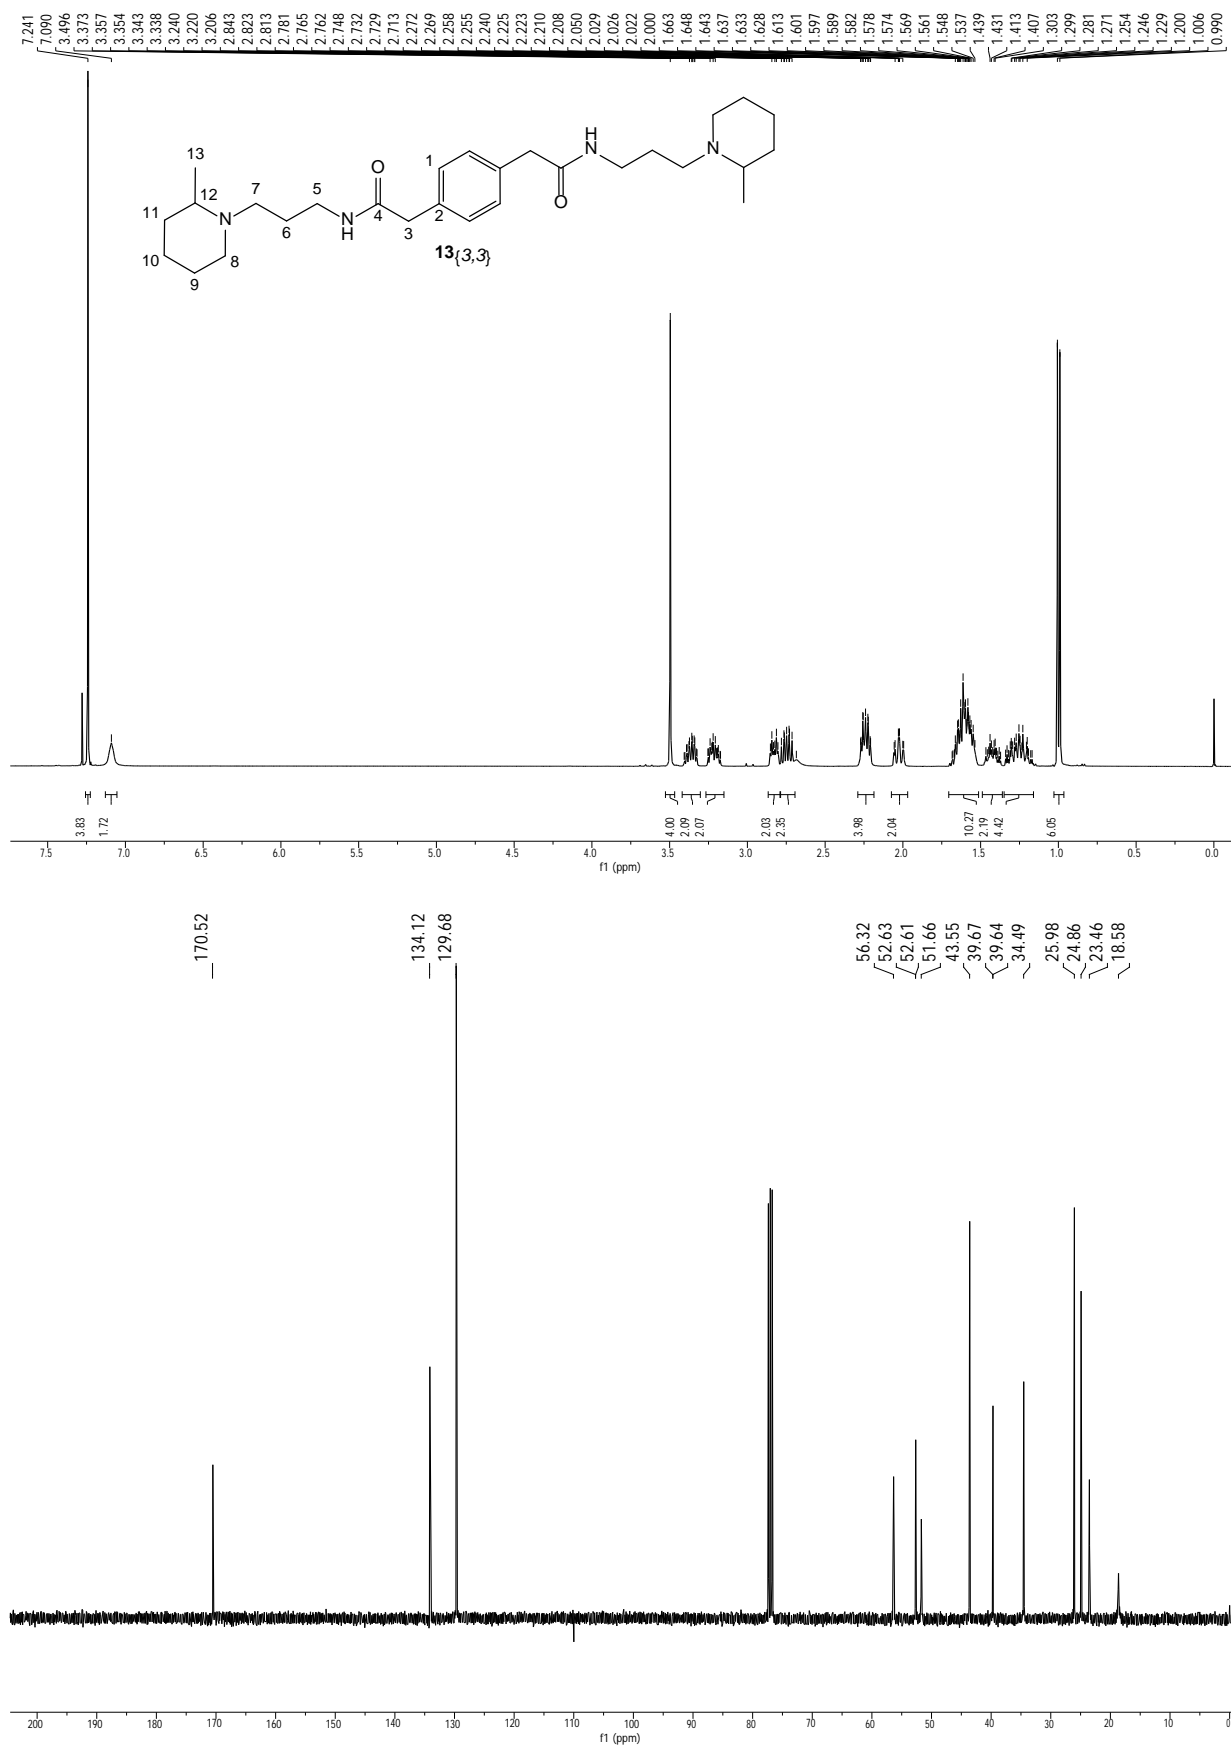

**Fig. S-3:** <sup>1</sup>H and <sup>13</sup>C-NMR of *N,N'*-bis(3-(2-pipecolin-1-yl)propyl)-1,4-di(amino-carbonylmethyl)benzene (**13**{3,3}).

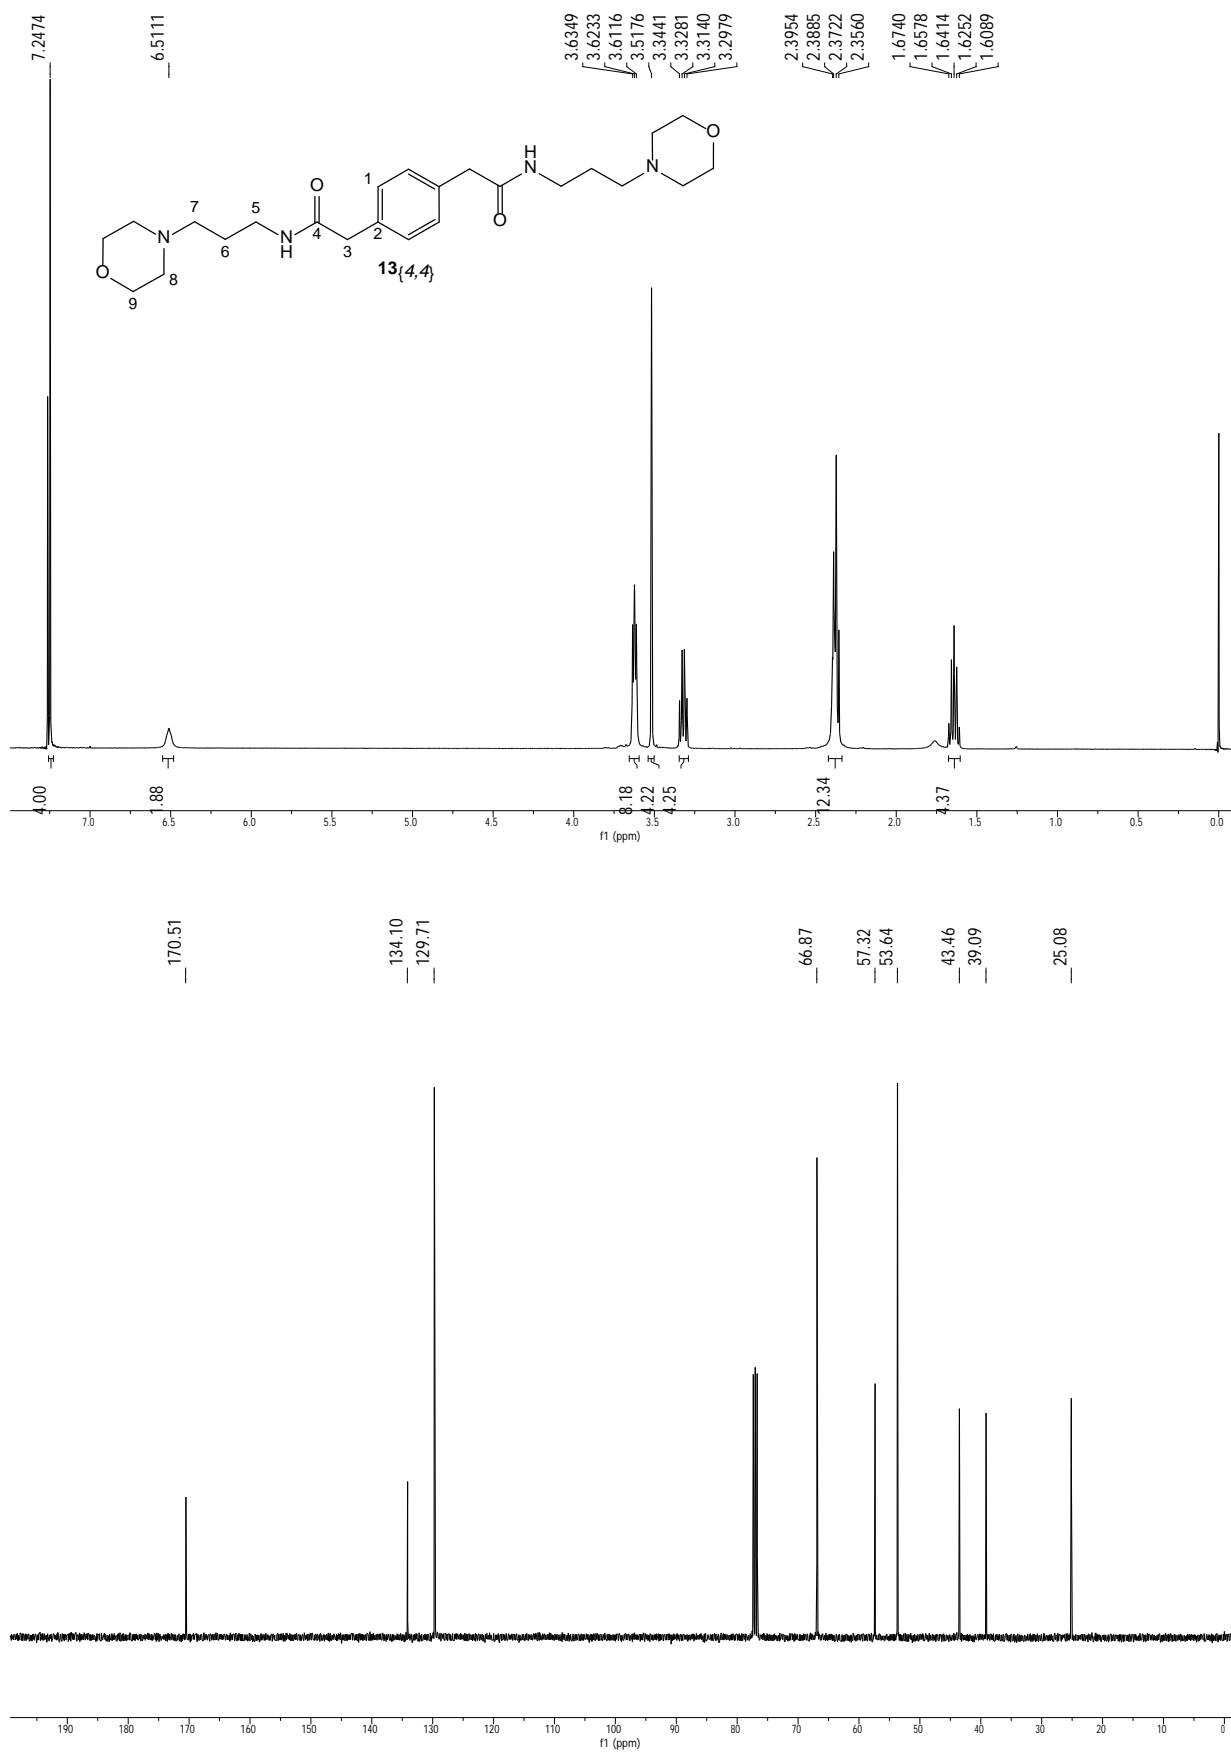

**Fig. S-4:** <sup>1</sup>H and <sup>13</sup>C-NMR of *N,N'*-bis(3-(morpholin-4-yl)propyl)-1,4-di(amino-carbonylmethyl)benzene (**13{4,4}**).



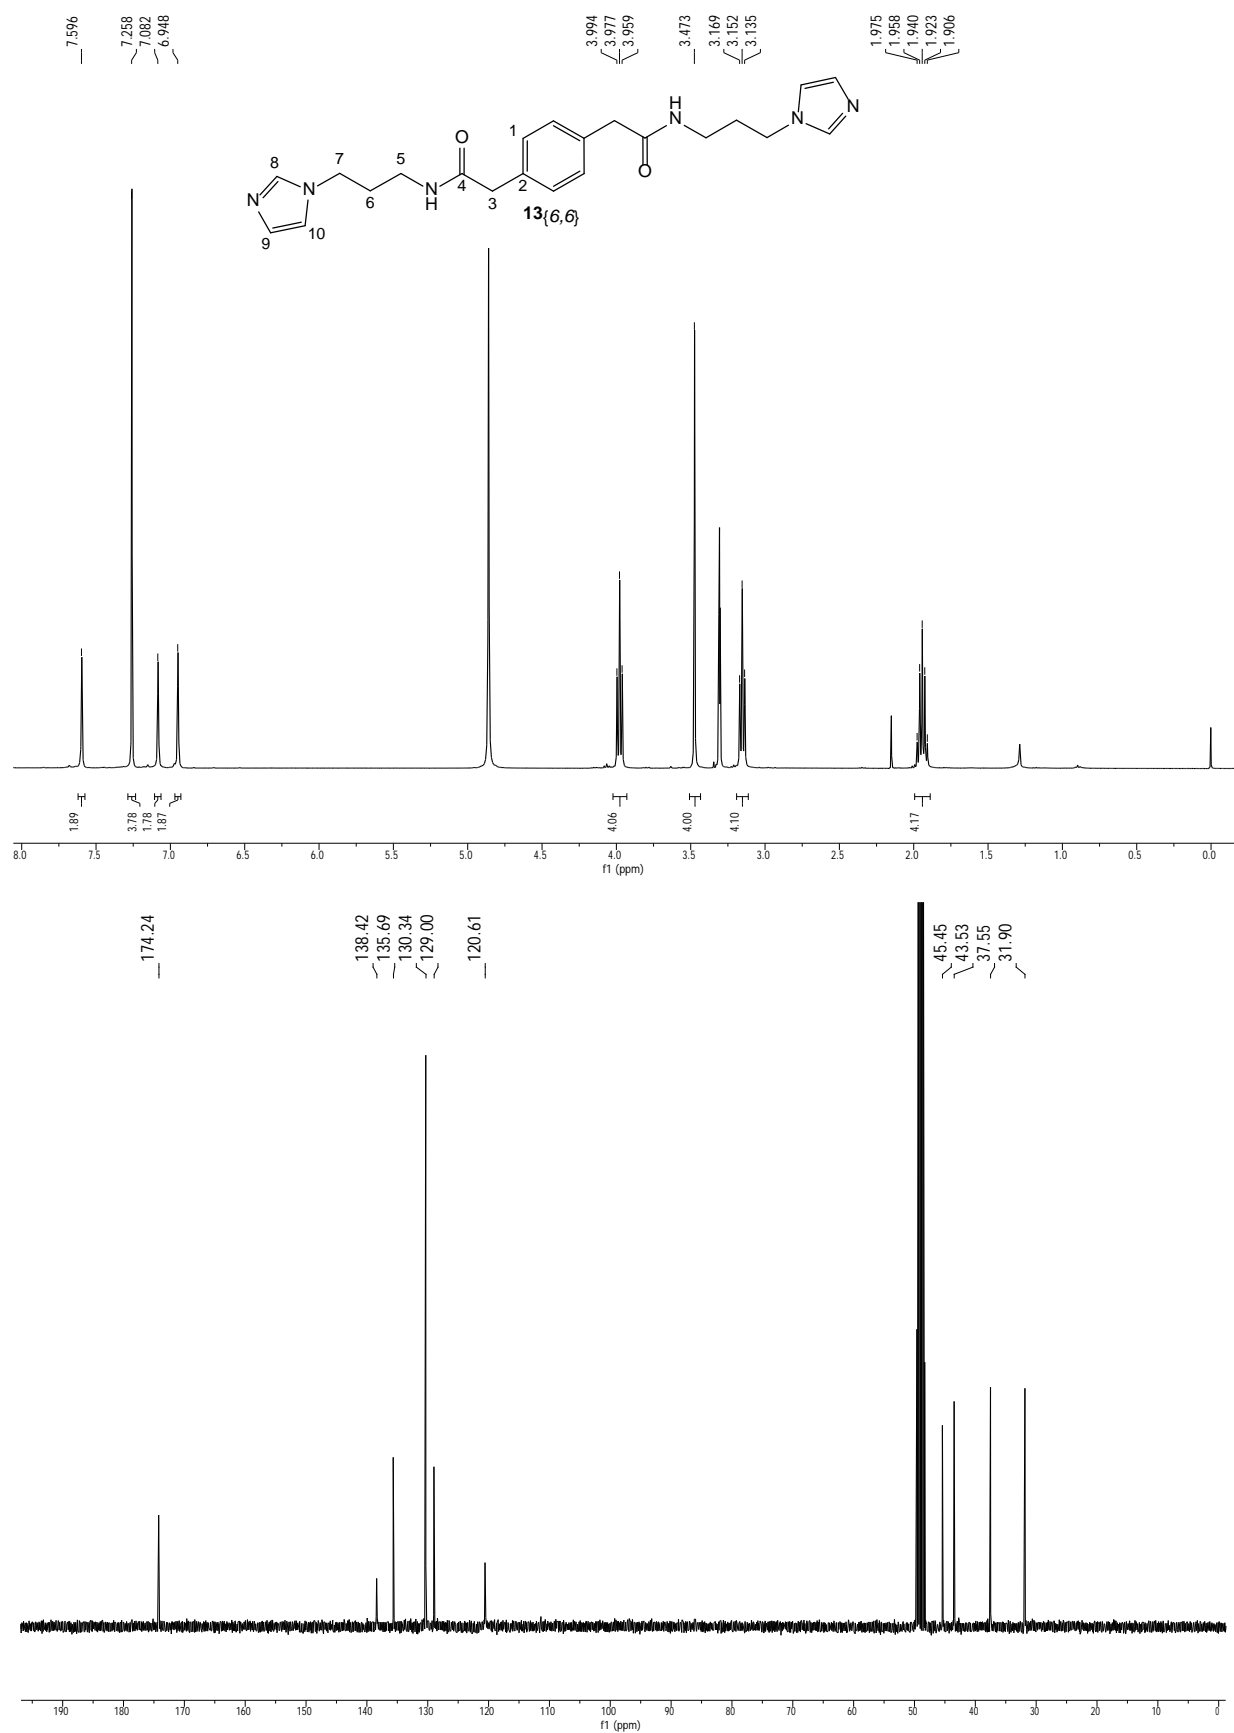

**Fig. S-6:** <sup>1</sup>H and <sup>13</sup>C-NMR of *N,N'*-bis(3-(imidazol-1-yl)propyl)-1,4-di(aminocarbonylmethyl)benzene (**13**{6,6}).

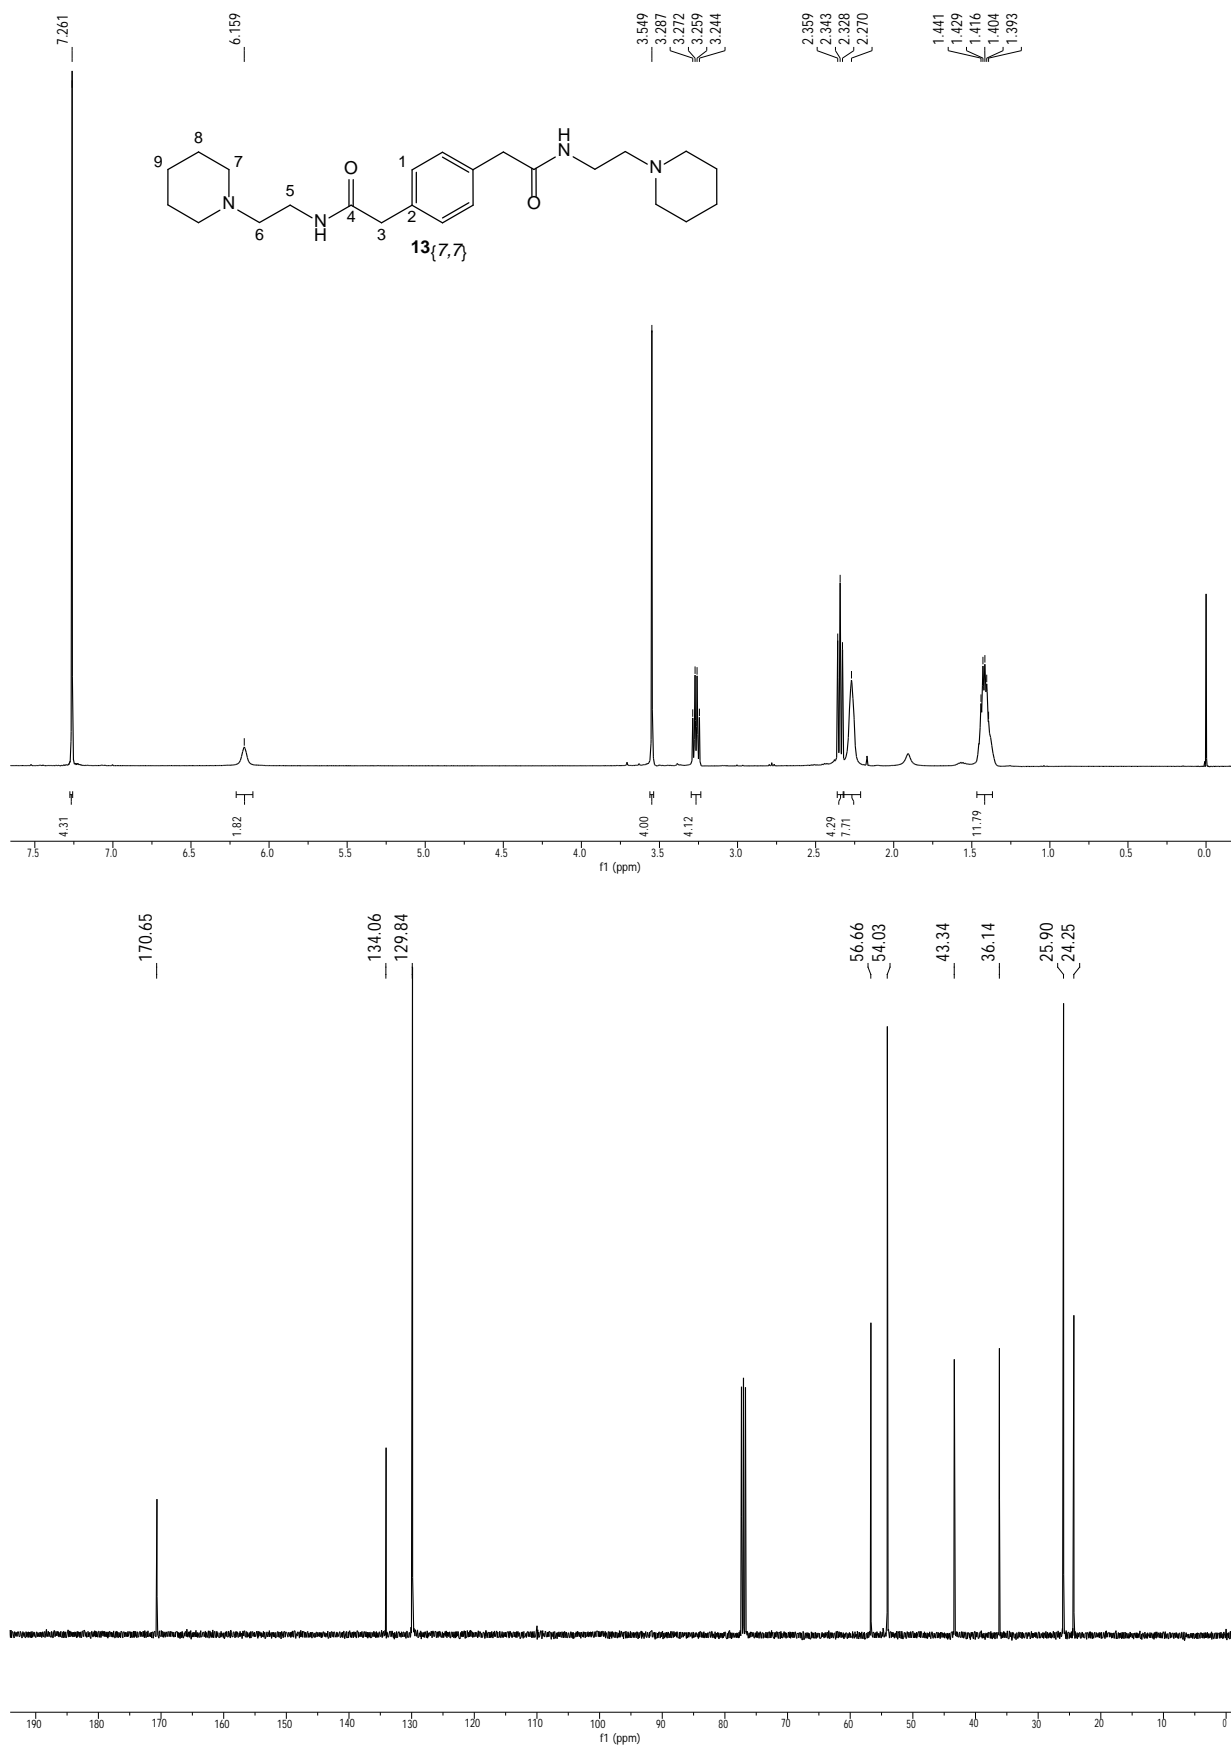

**Fig. S-7:** <sup>1</sup>H and <sup>13</sup>C-NMR of *N,N'*-bis(2-(piperidin-1-yl)ethyl)-1,4-di(aminocarbonylmethyl)benzene (**13{7,7}**).



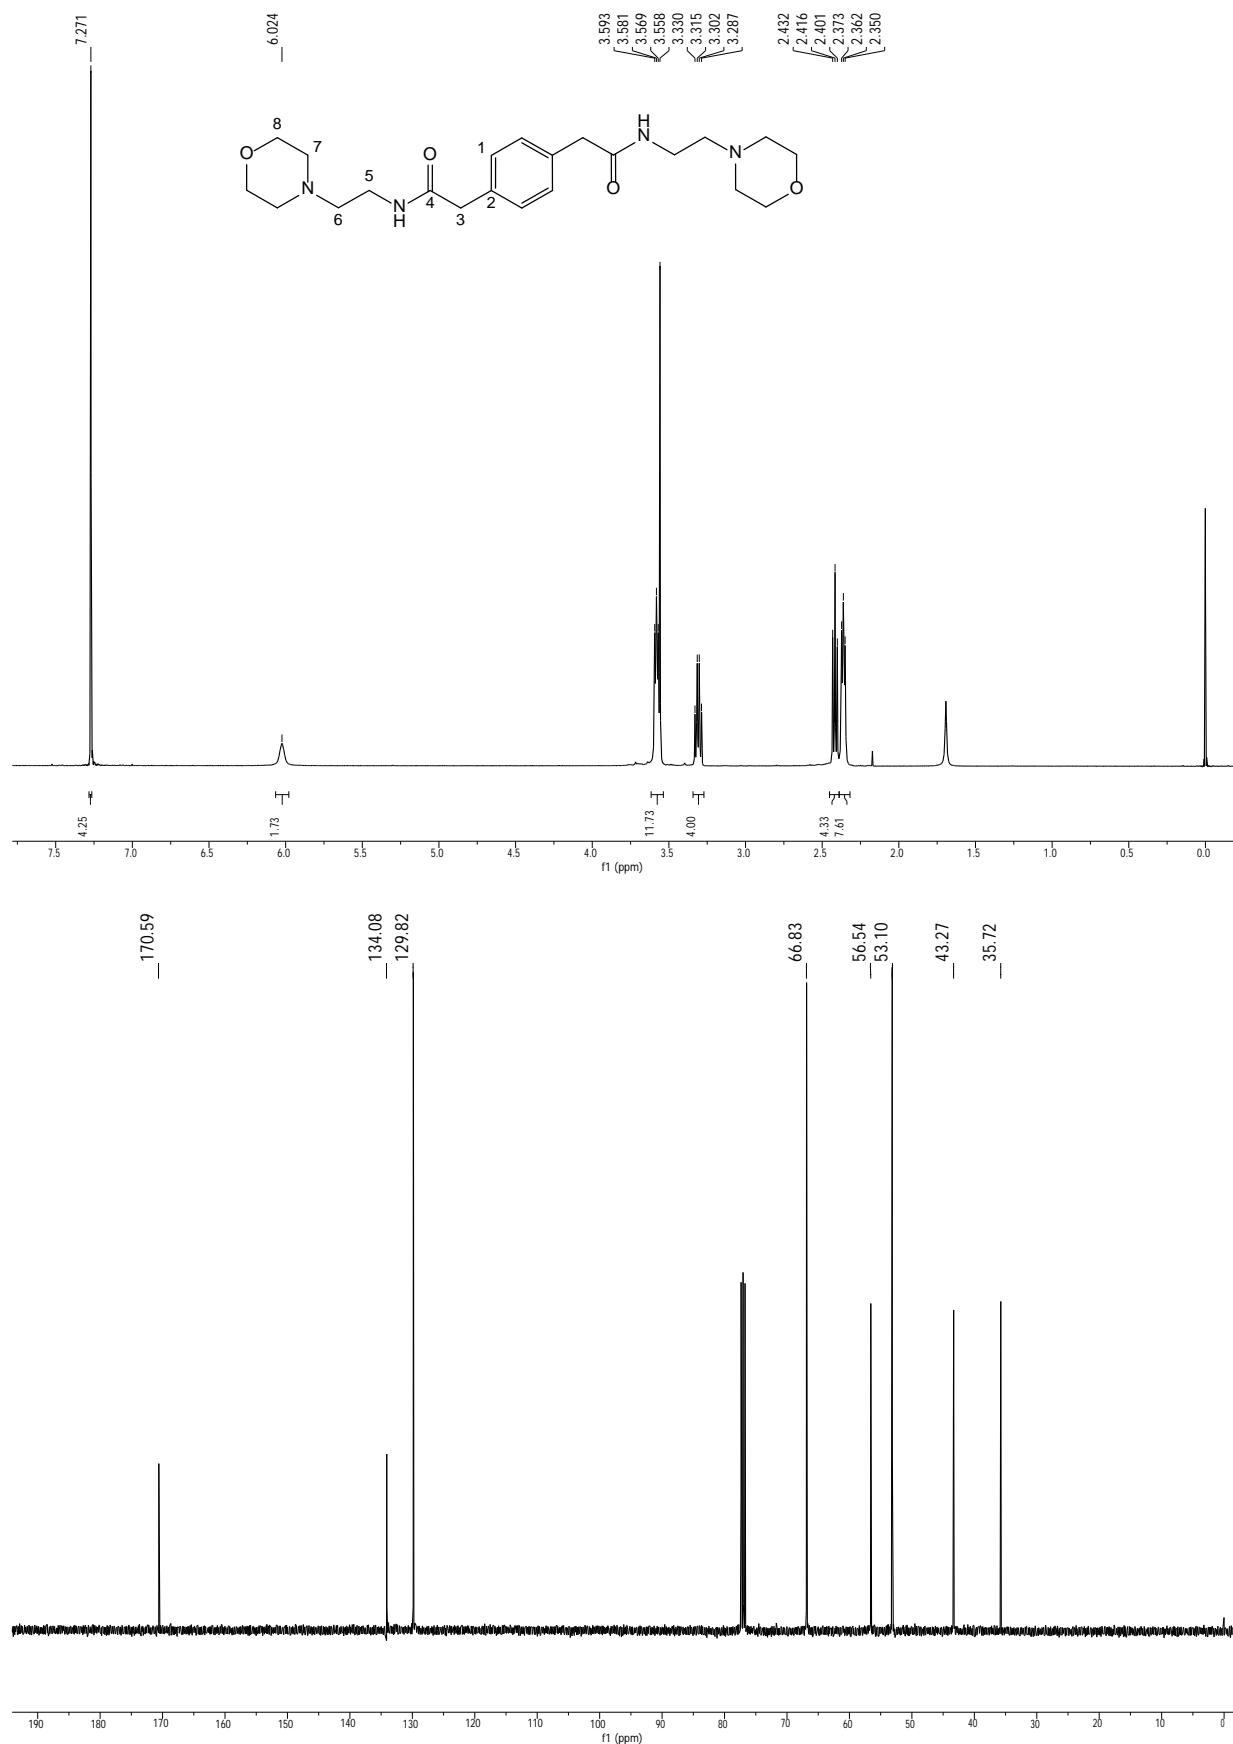

**Fig. S-8:** <sup>1</sup>H and <sup>13</sup>C-NMR of *N,N'*-bis(2-(morpholin-4-yl)ethyl)-1,4-di(aminocarbonyl)methylbenzene (**13**{8,8}).

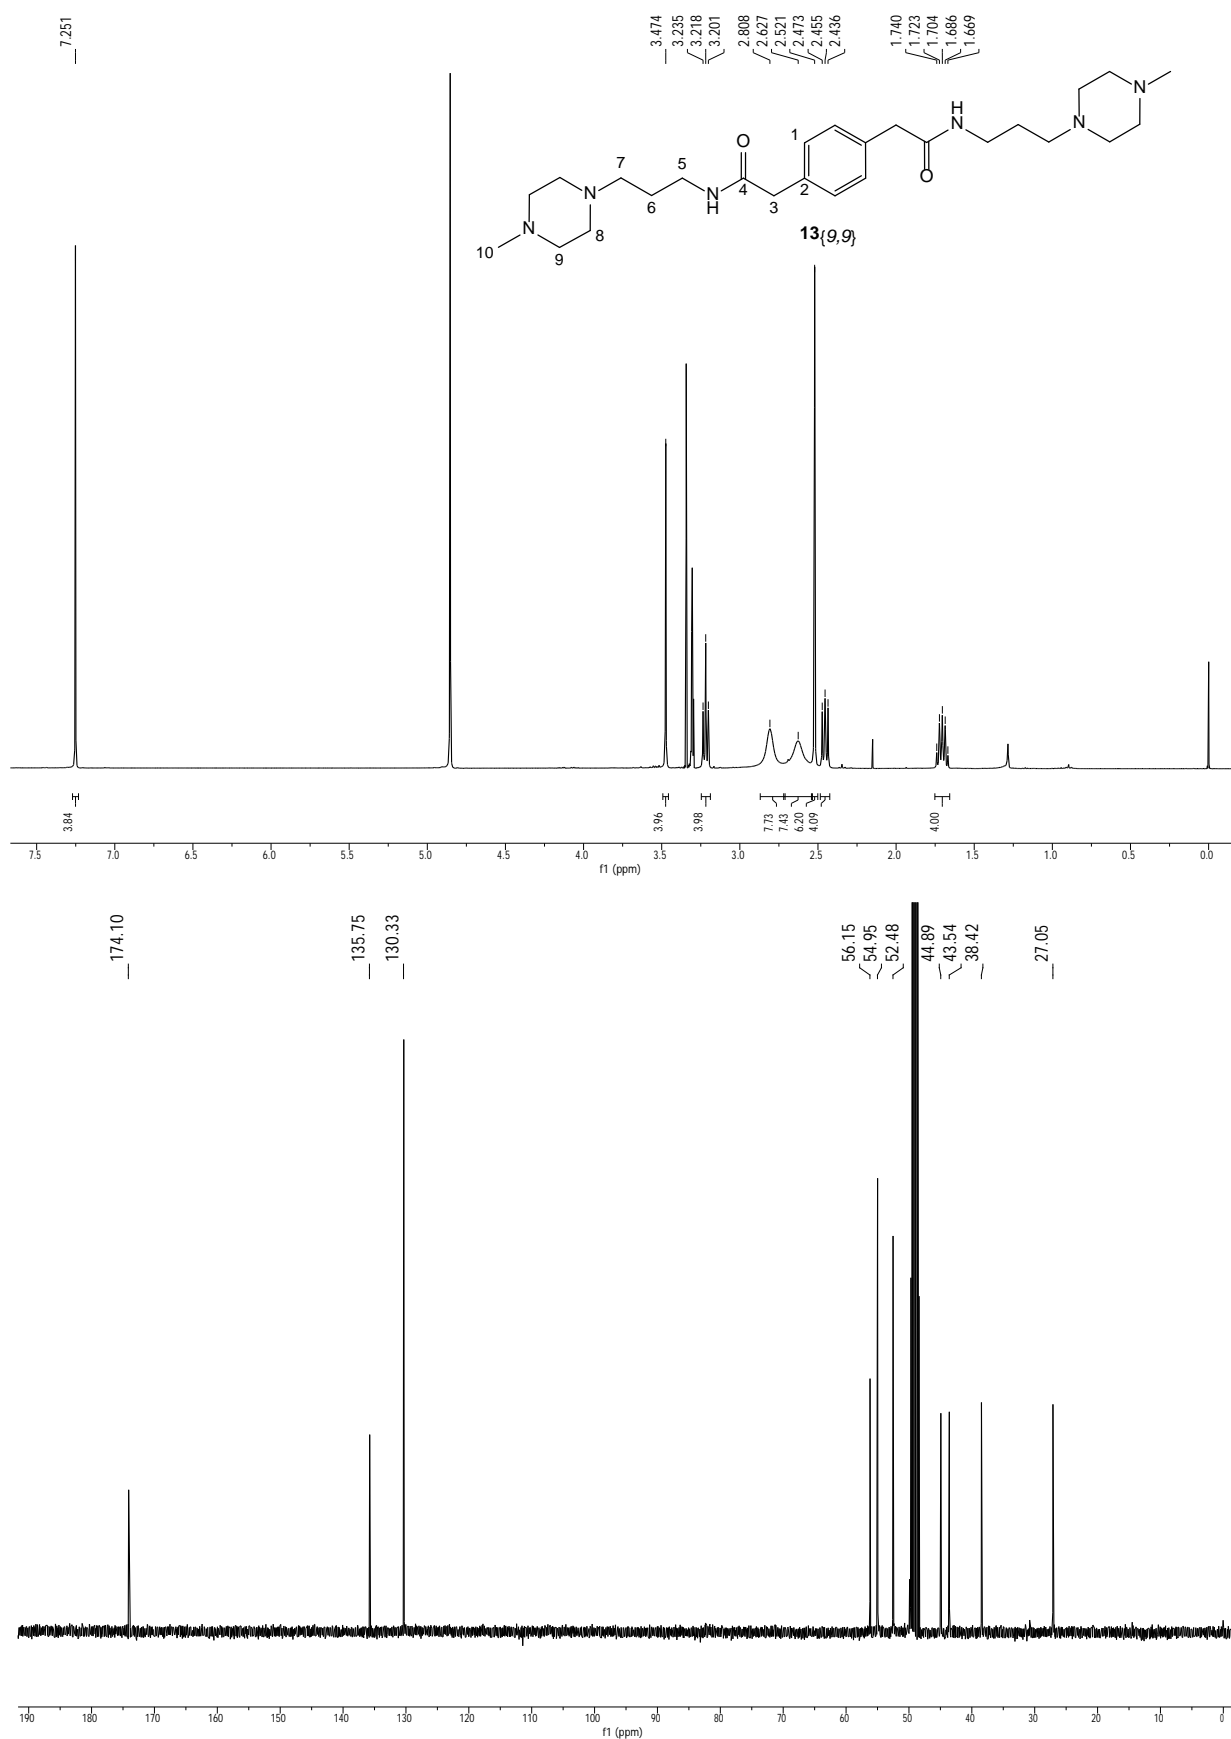

**Fig. S-9:** <sup>1</sup>H and <sup>13</sup>C-NMR of *N,N'*-bis(3-(4-methylpiperazin-1-yl)propyl)-1,4-di(aminocarbonylmethyl)benzene (**13**{9,9}).

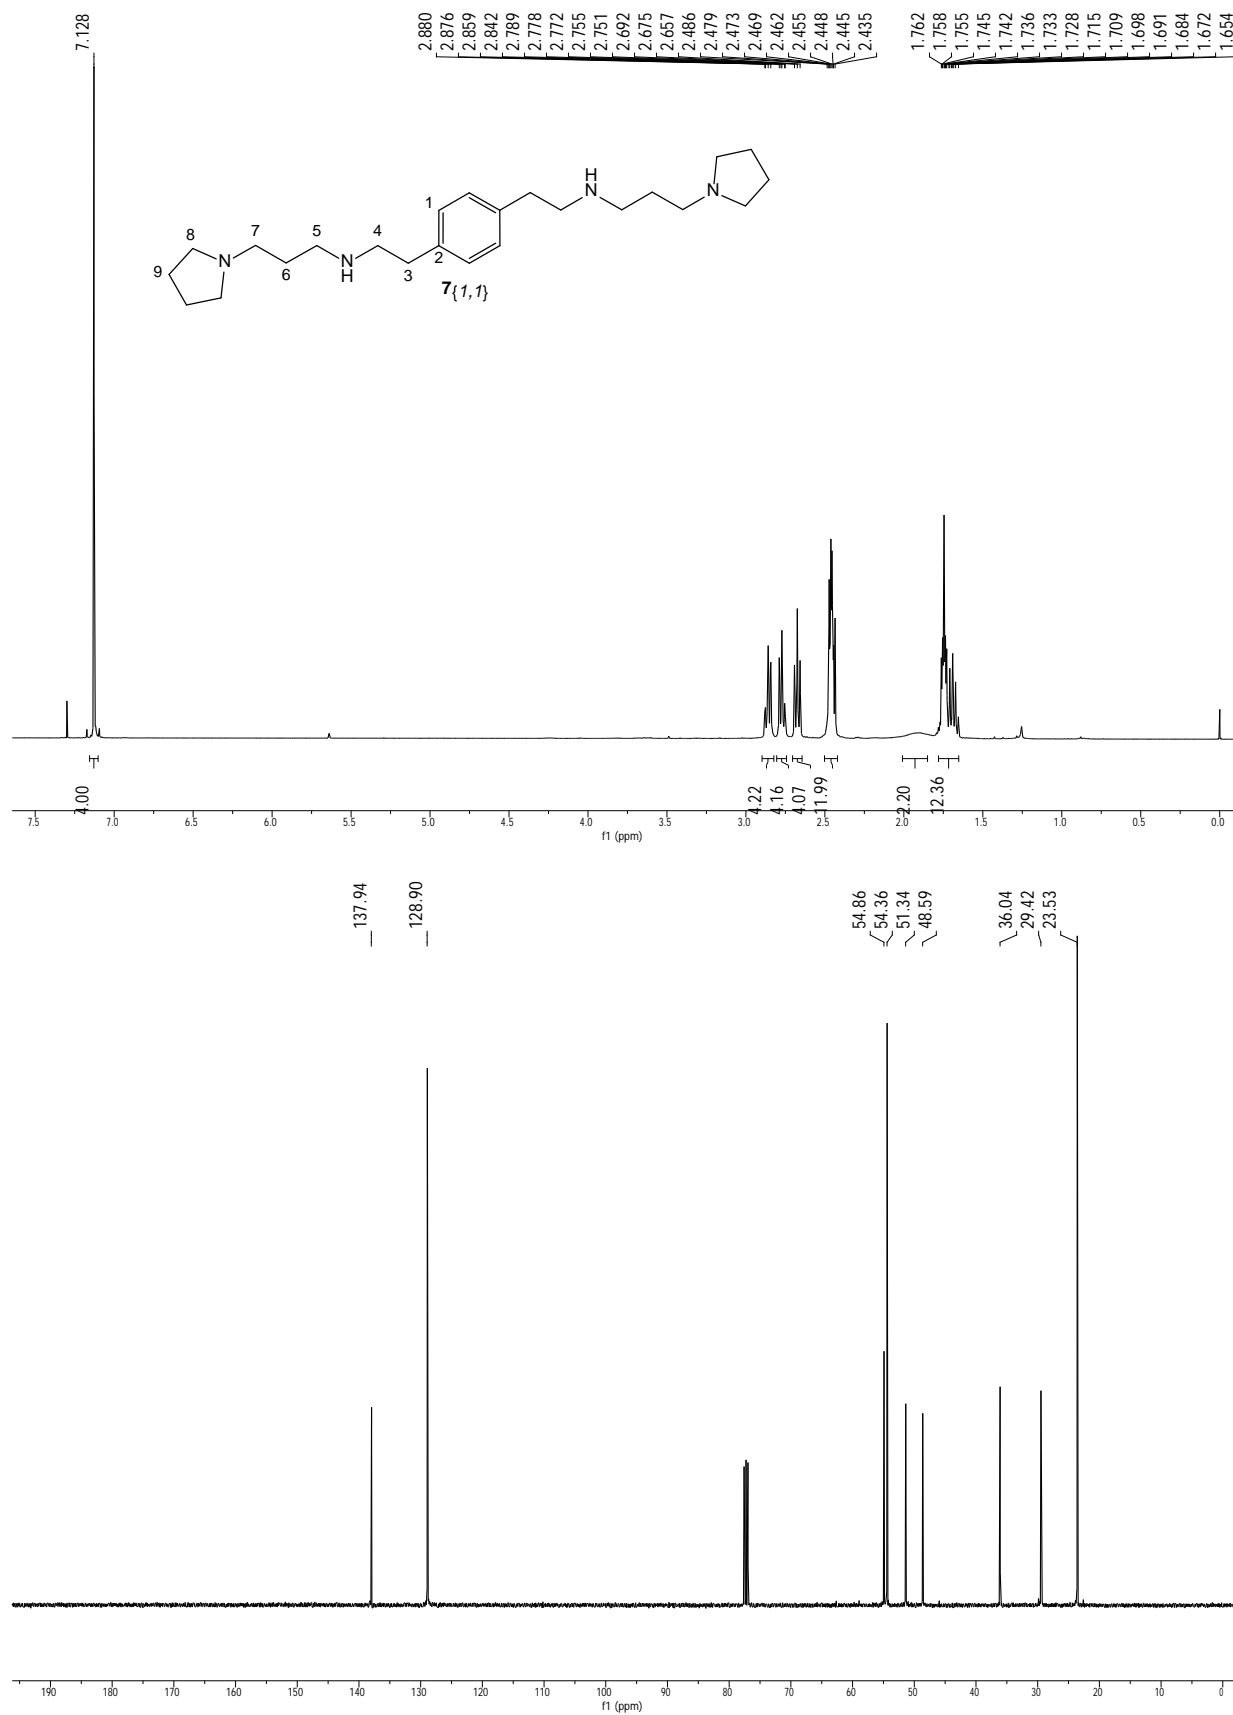

**Fig. S-10:** <sup>1</sup>H and <sup>13</sup>C-NMR of *N,N'*-bis(3-(pyrrolidin-1-yl)propyl)-1,4-bis(2-aminoeth-1-yl)benzene (**7{1,1}**).

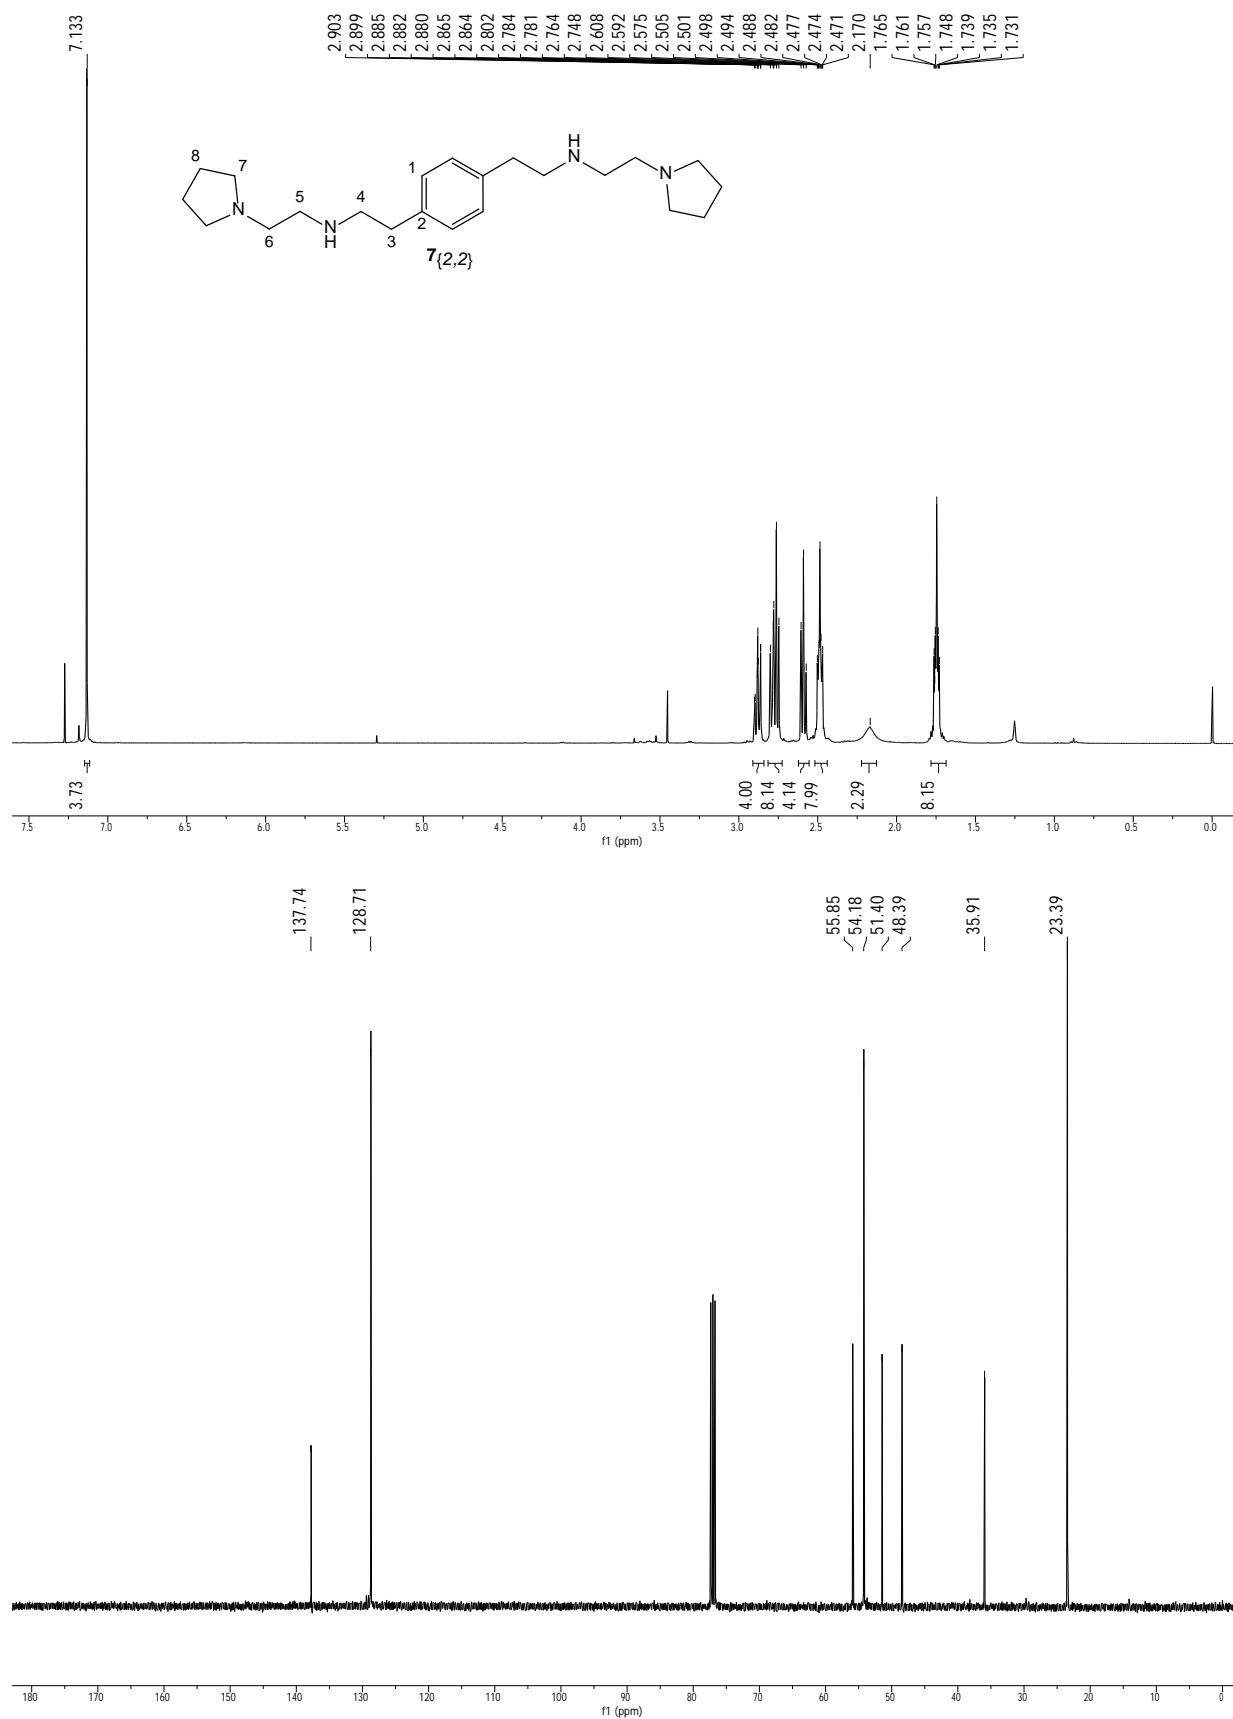

**Fig. S-11:** <sup>1</sup>H and <sup>13</sup>C-NMR of *N,N'*-bis(2-(pyrrolidin-1-yl)ethyl)-1,4-bis(2-aminoethyl)benzene (**7{2,2}**).

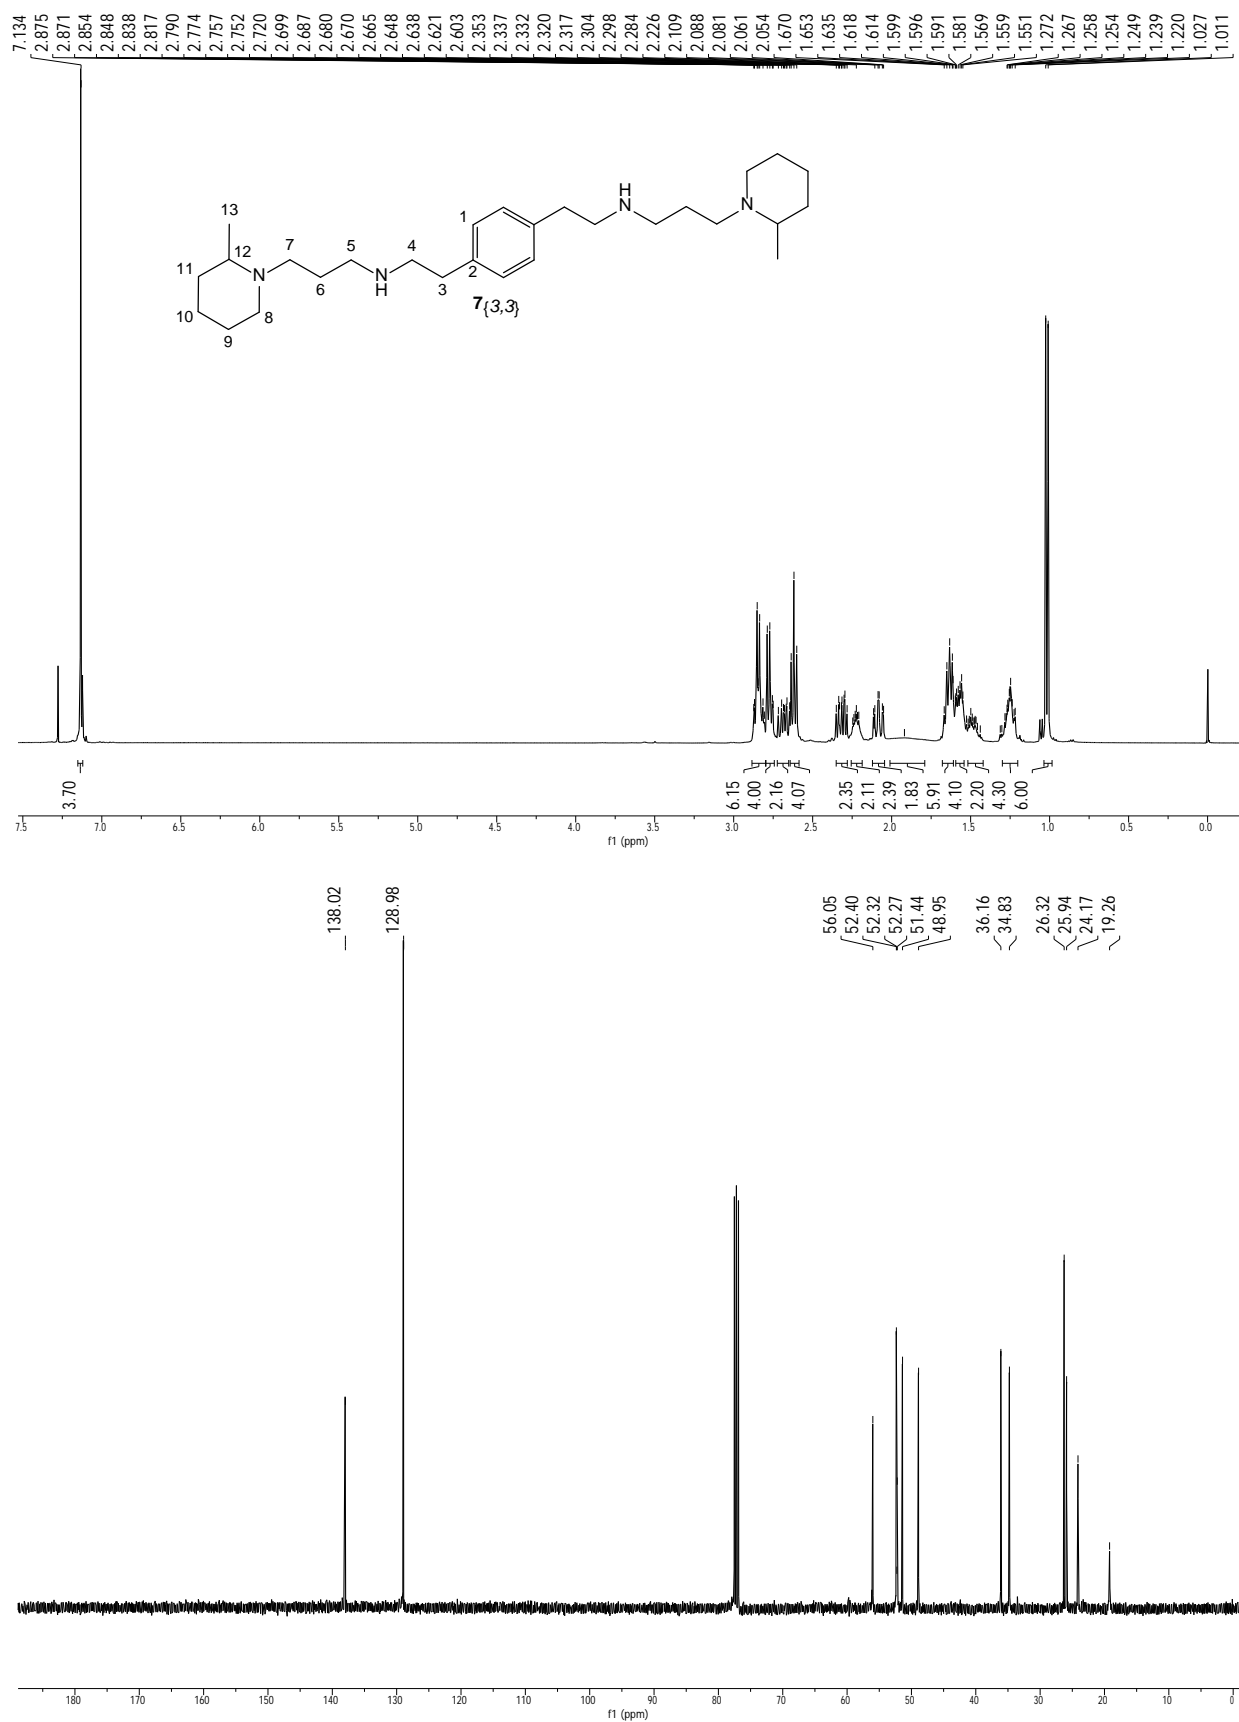

**Fig. S-12:** <sup>1</sup>H and <sup>13</sup>C-NMR of *N,N'*-bis(3-(2-pipecolin-1-yl)propyl)-1,4-bis(2-aminoeth-1-yl)benzene (**7**{3,3}).

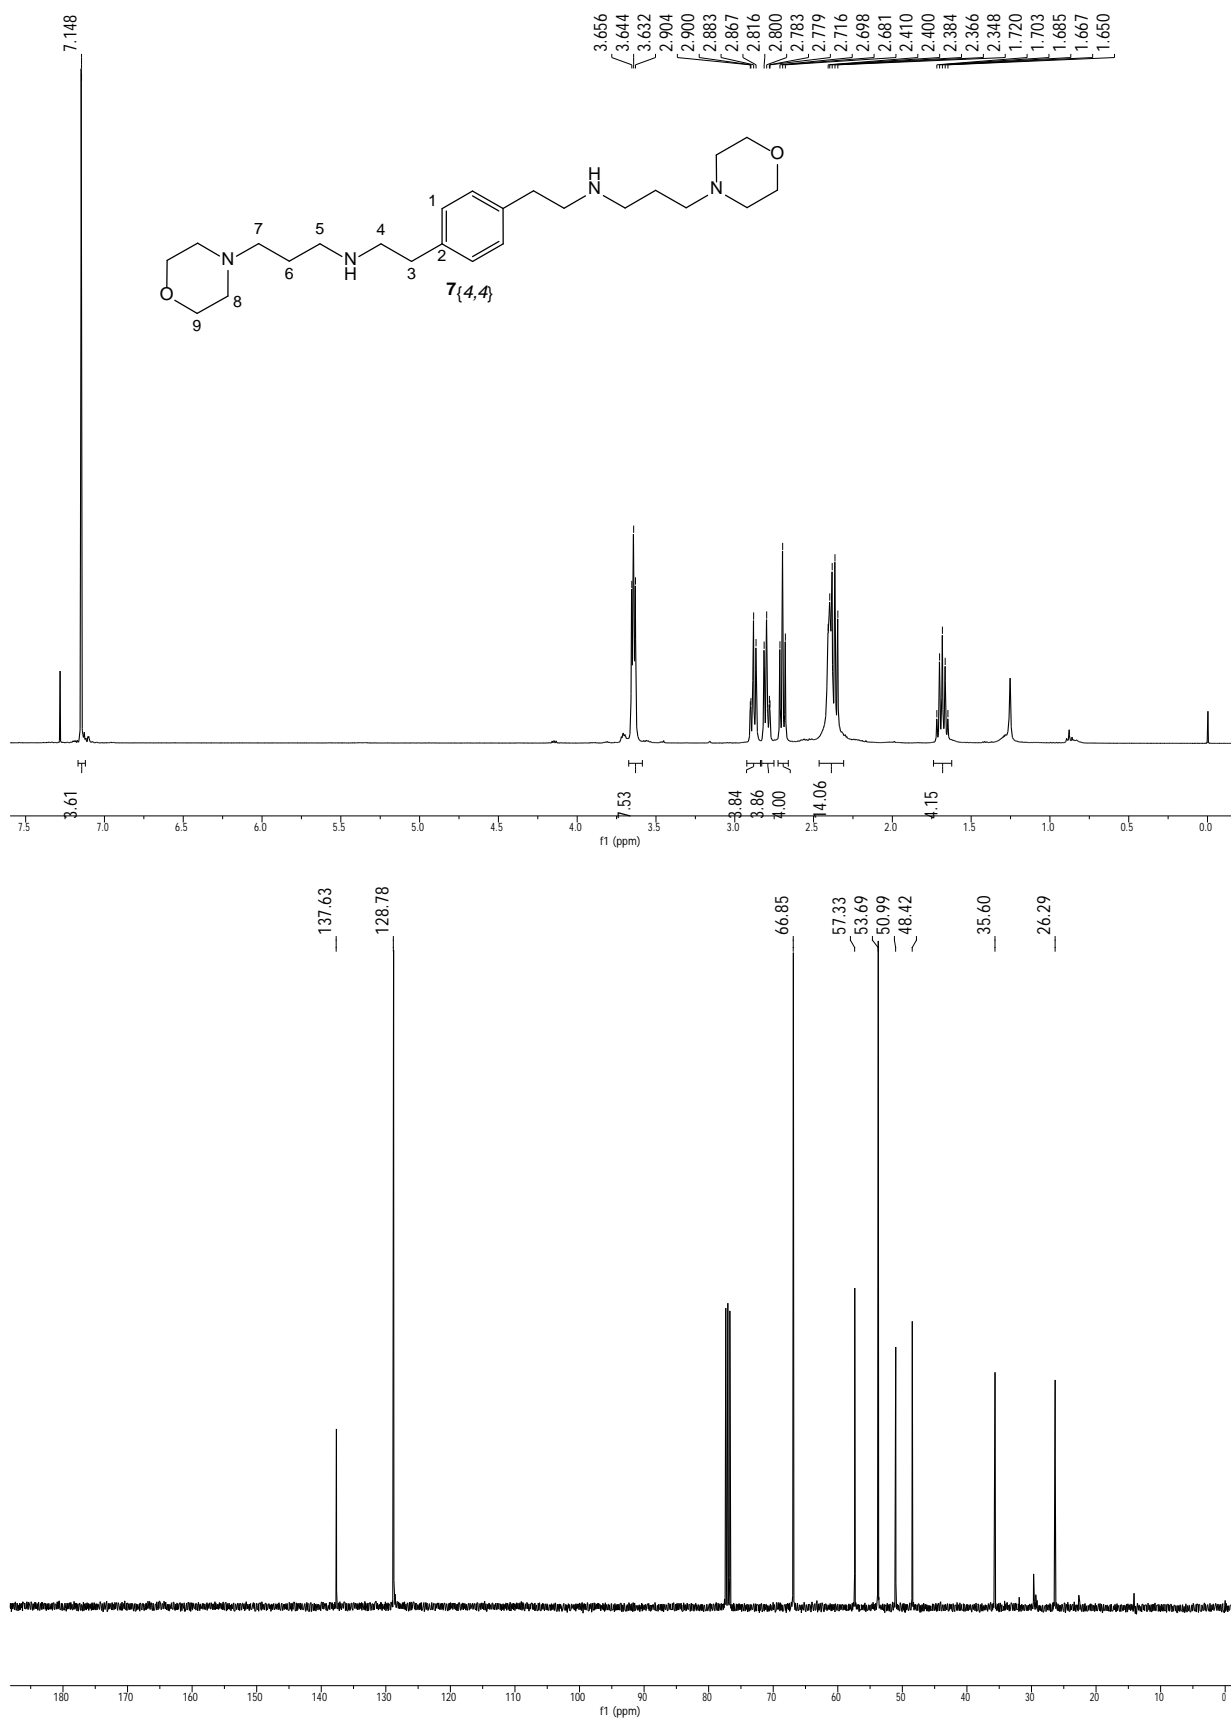

**Fig. S-13:** <sup>1</sup>H and <sup>13</sup>C-NMR of *N,N'*-bis(3-(morpholin-4-yl)propyl)-1,4-bis(2-aminoeth-1-yl)benzene (7{4,4}).

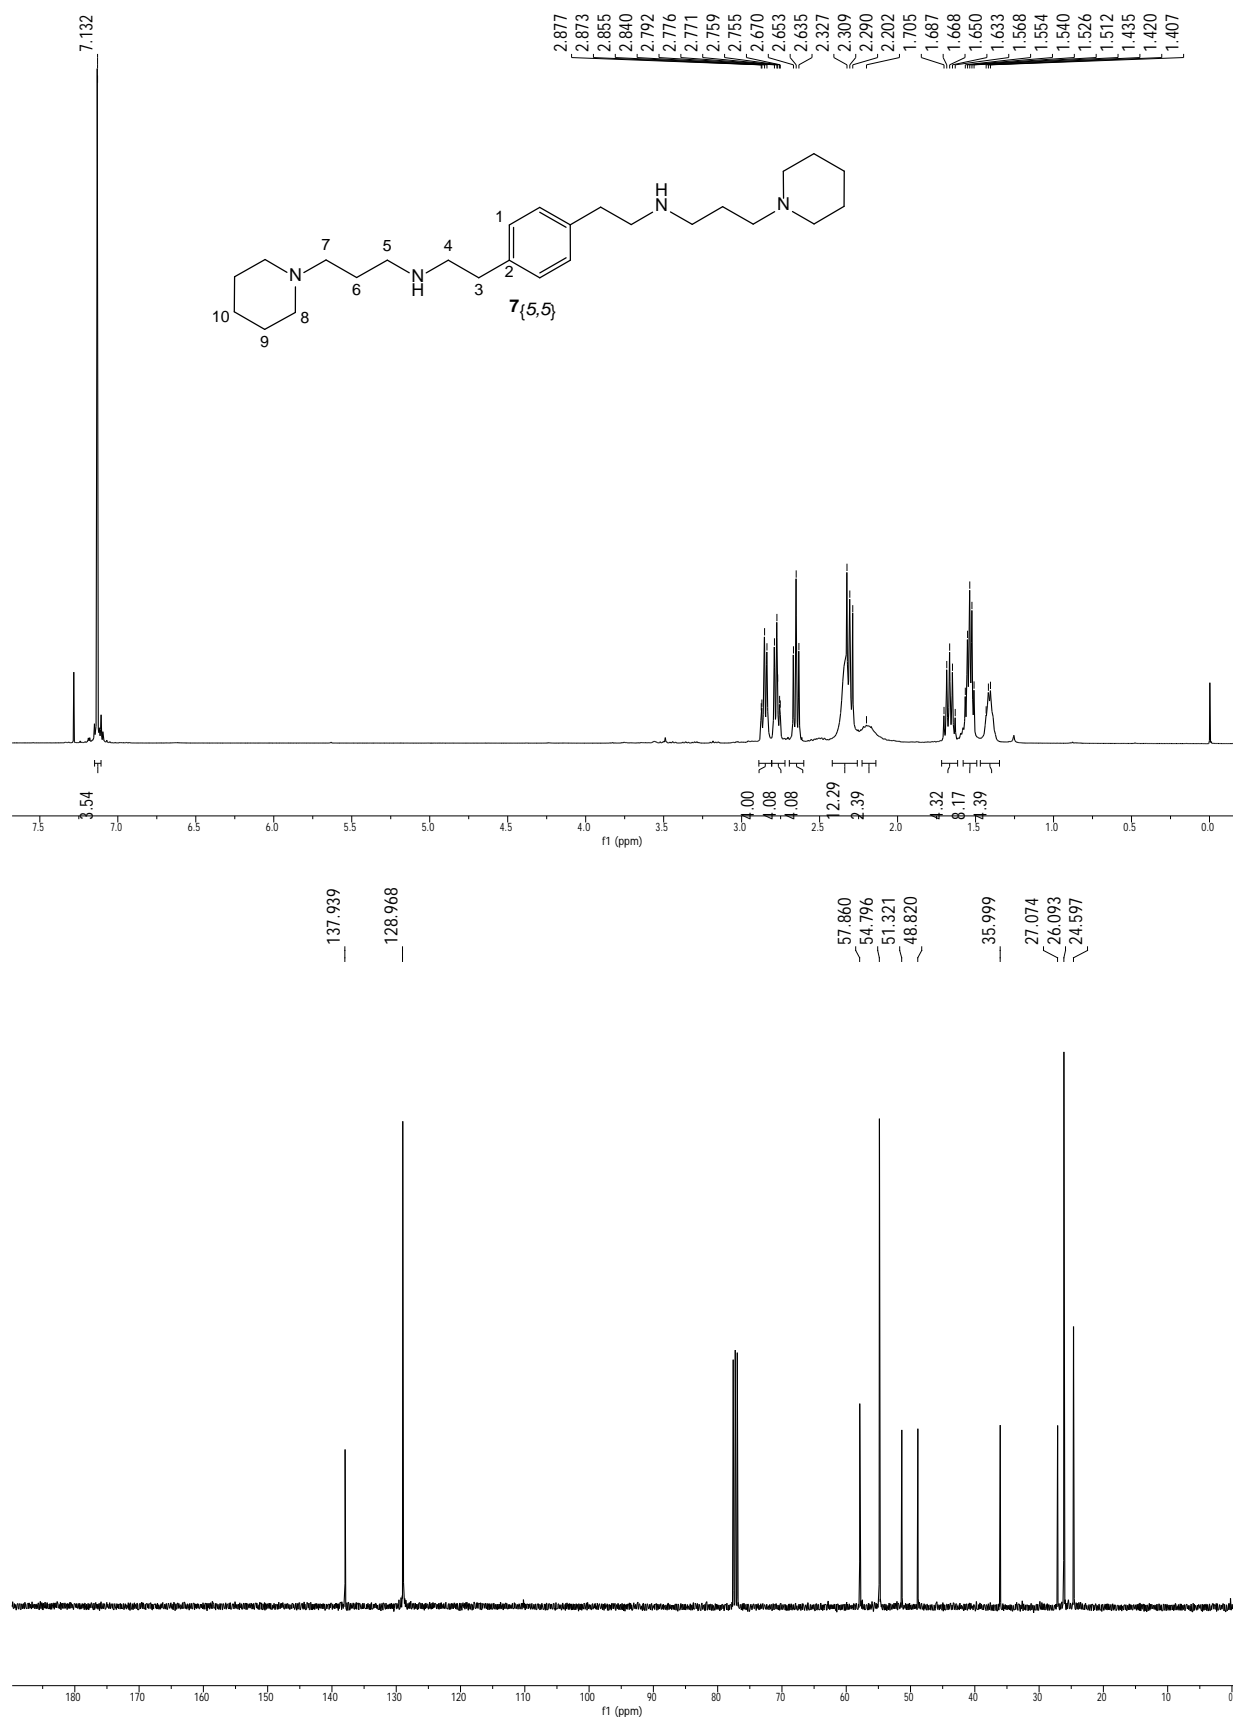

**Fig. S-14:** <sup>1</sup>H and <sup>13</sup>C-NMR of *N,N'*-bis(3-(piperidin-1-yl)propyl)-1,4-bis(2-aminoethyl)benzene (**7{5,5}**).

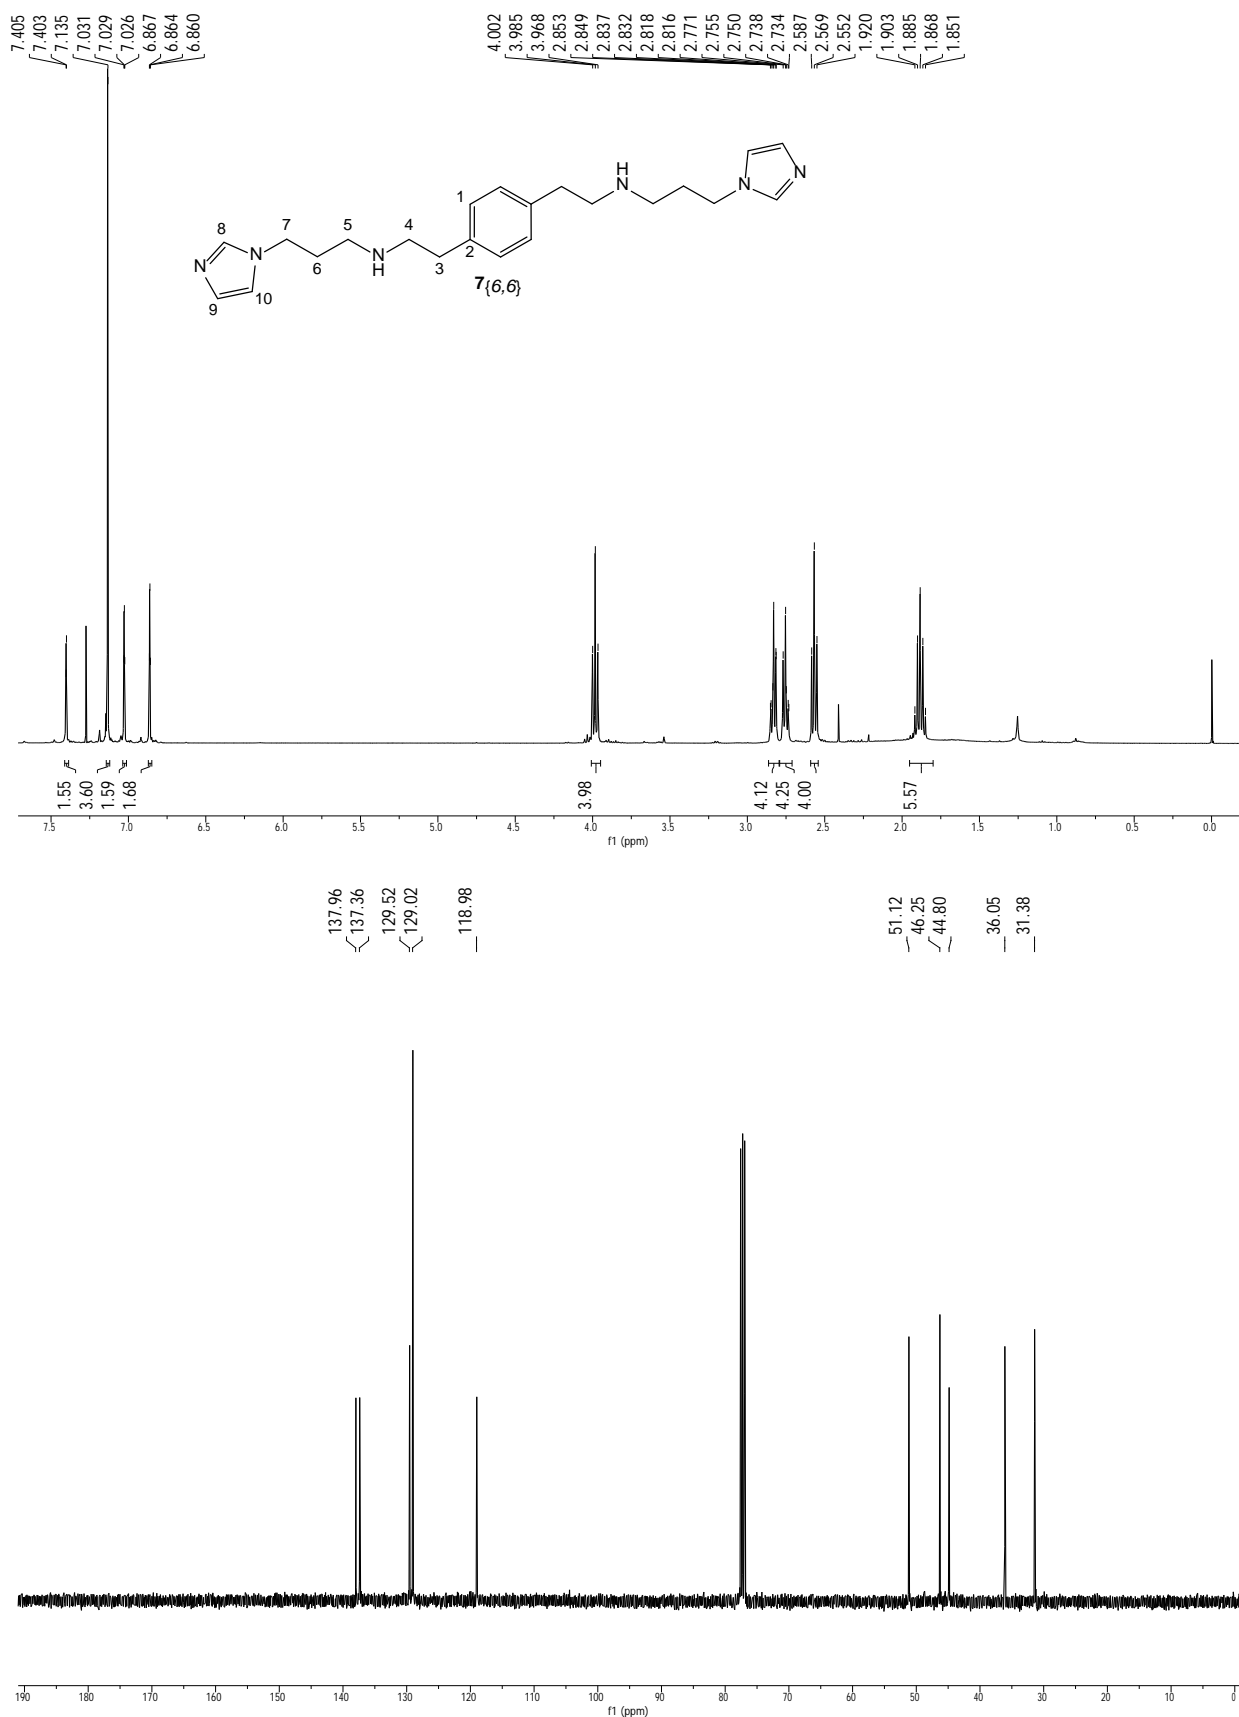

**Fig. S-15:** <sup>1</sup>H and <sup>13</sup>C-NMR of *N,N'*-bis(3-(imidazol-1-yl)propyl)-1,4-bis(2-aminoethyl)benzene (**7{6,6}**).



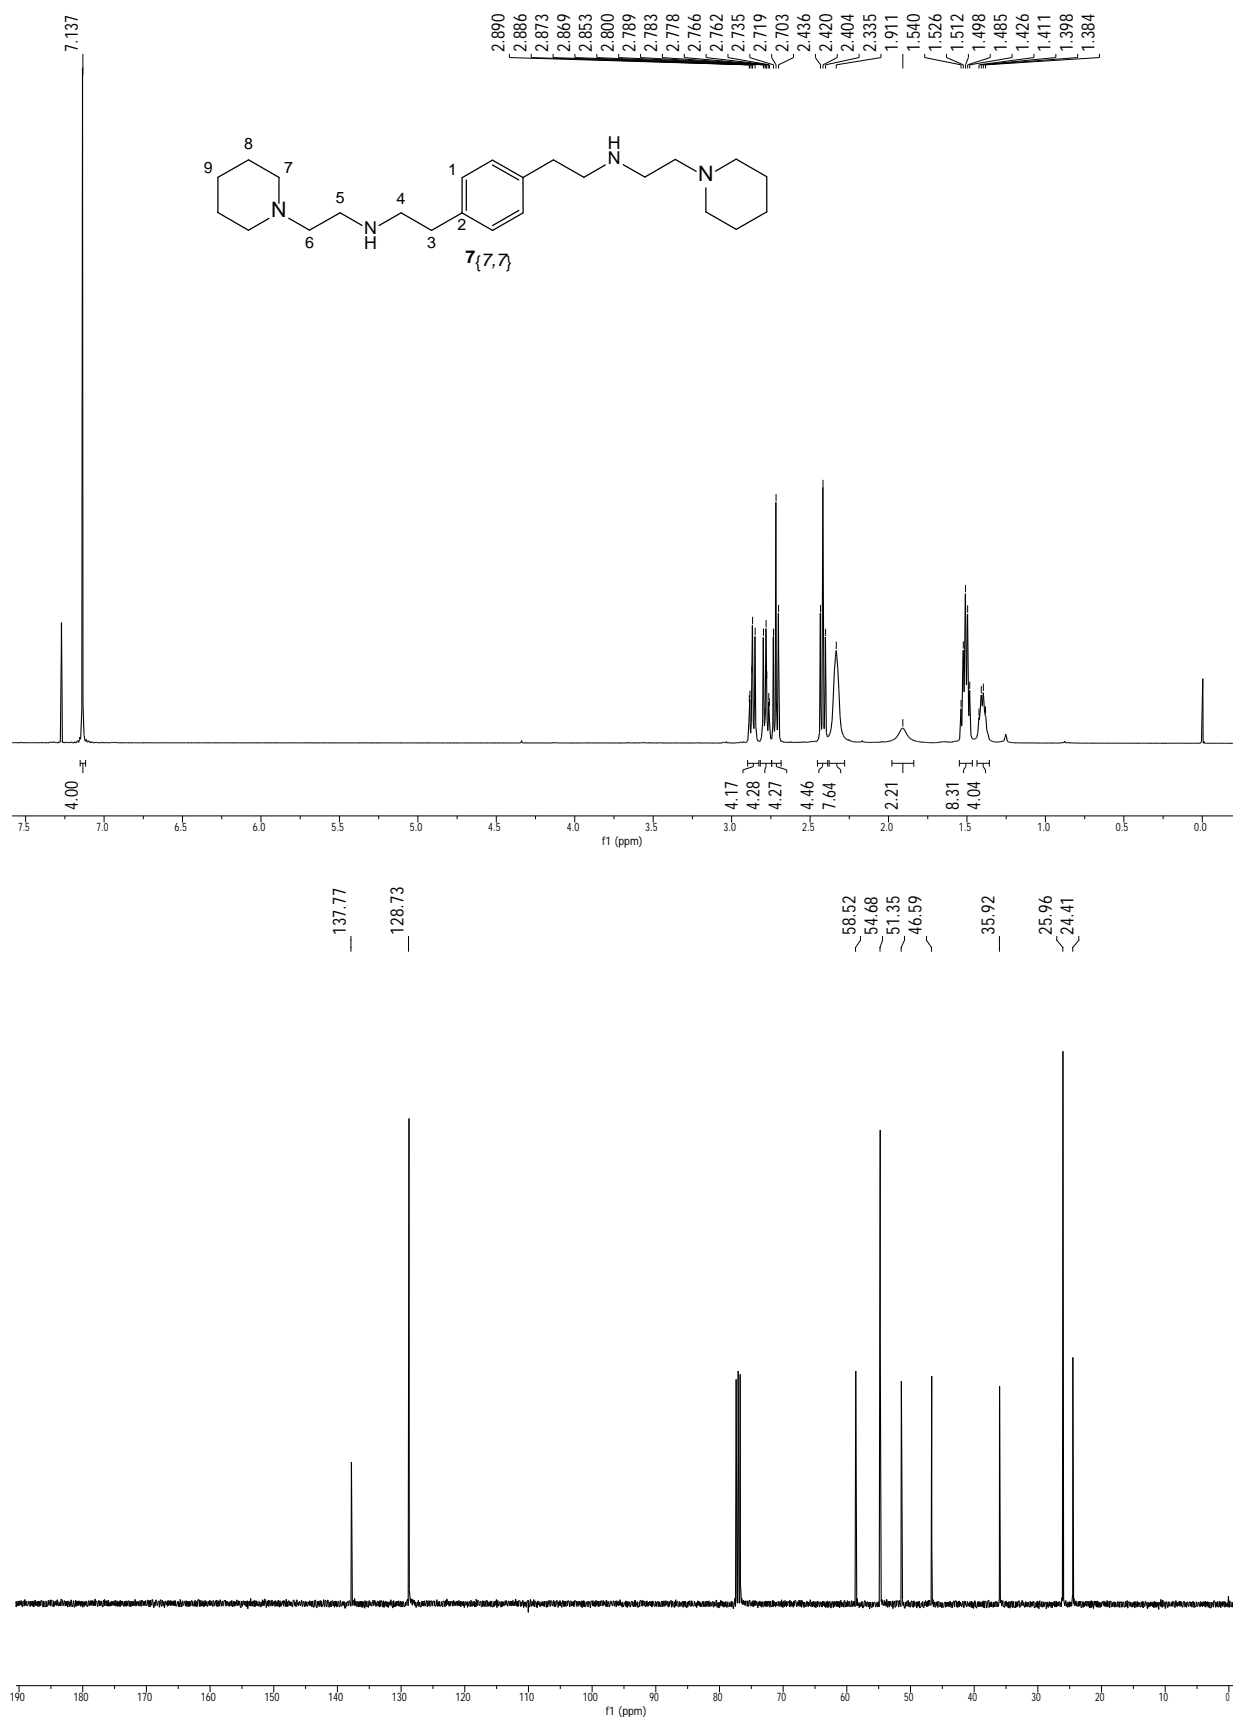

**Fig. S-16:** <sup>1</sup>H and <sup>13</sup>C-NMR of *N,N'*-bis(2-(piperidin-1-yl)ethyl)-1,4-bis(2-aminoeth-1-yl)benzene (**7{7,7}**).

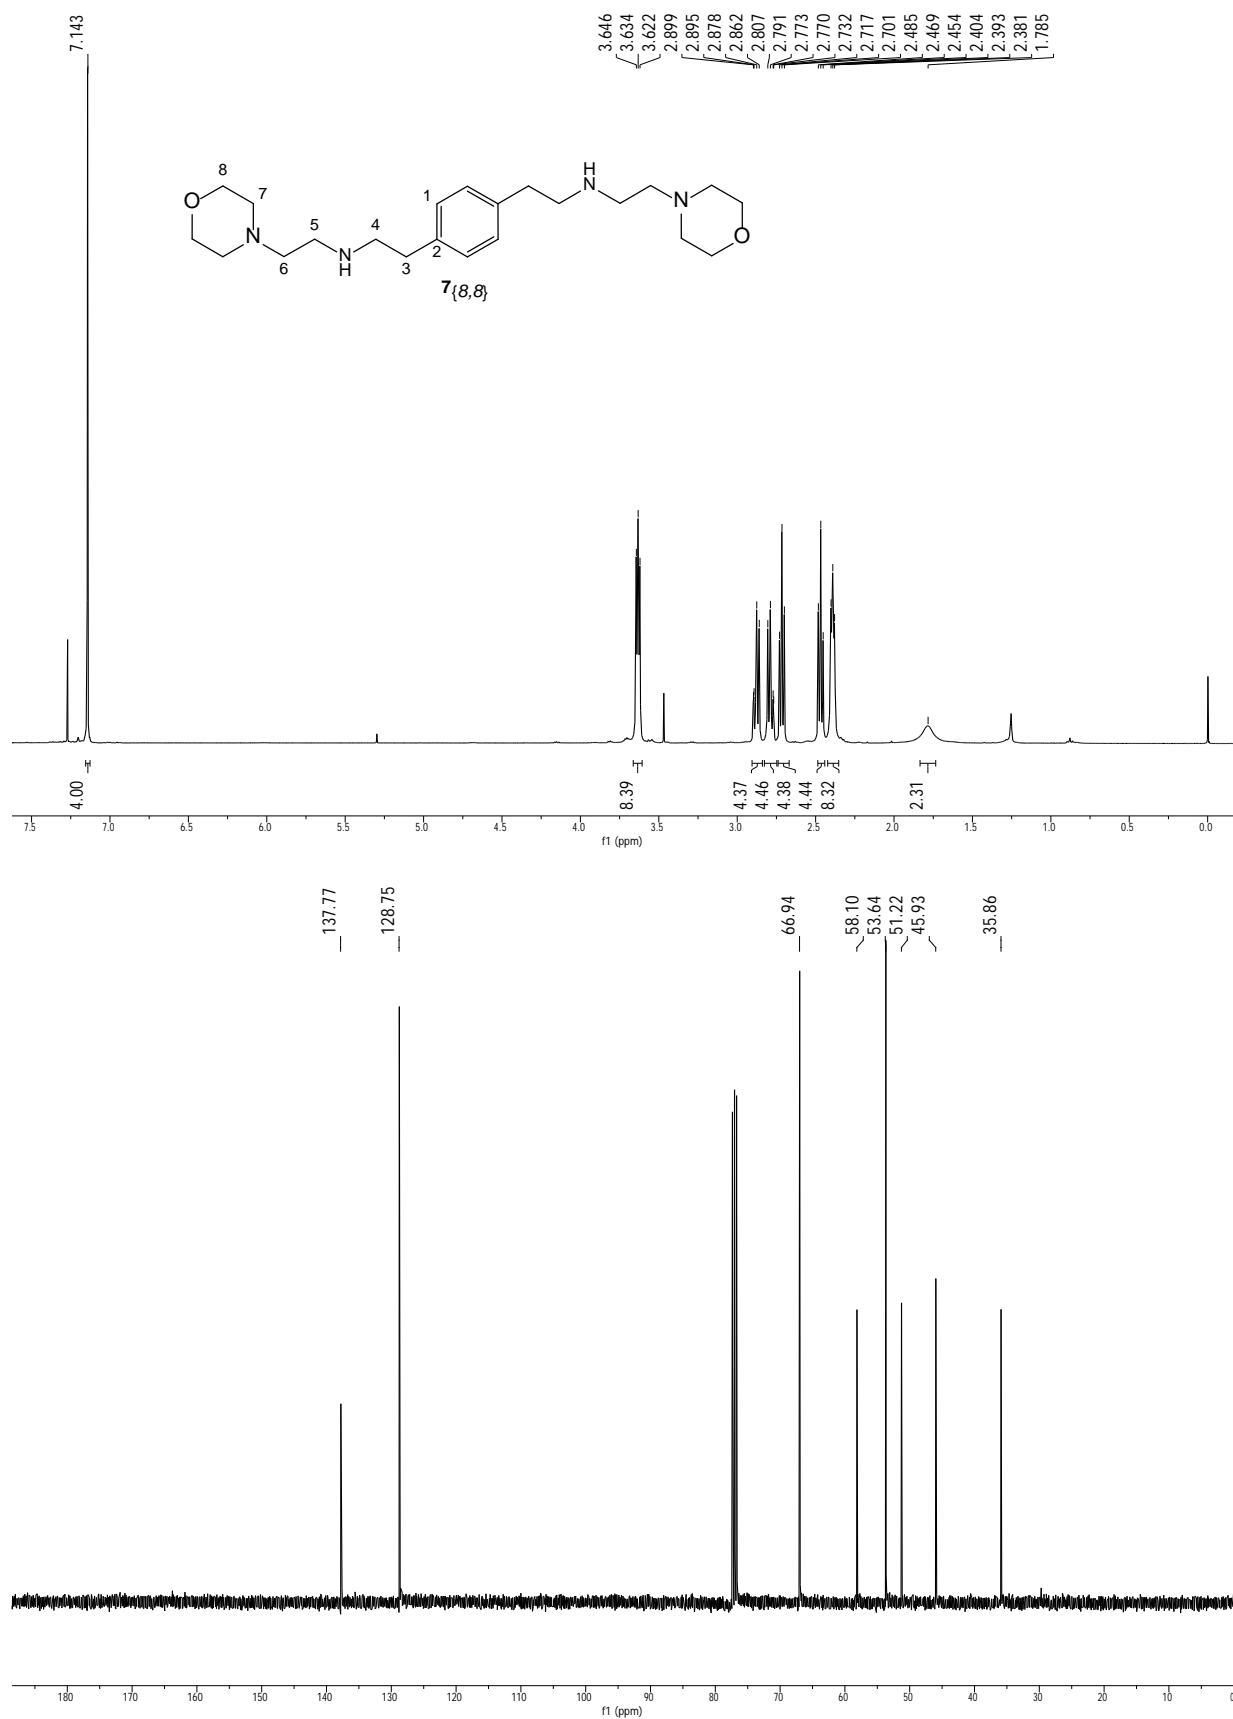

**Fig. S-17:** <sup>1</sup>H and <sup>13</sup>C-NMR of *N,N'*-bis(2-(morpholin-4-yl)ethyl)-1,4-bis(2-aminotet-1-yl)benzene (**7{8,8}**).

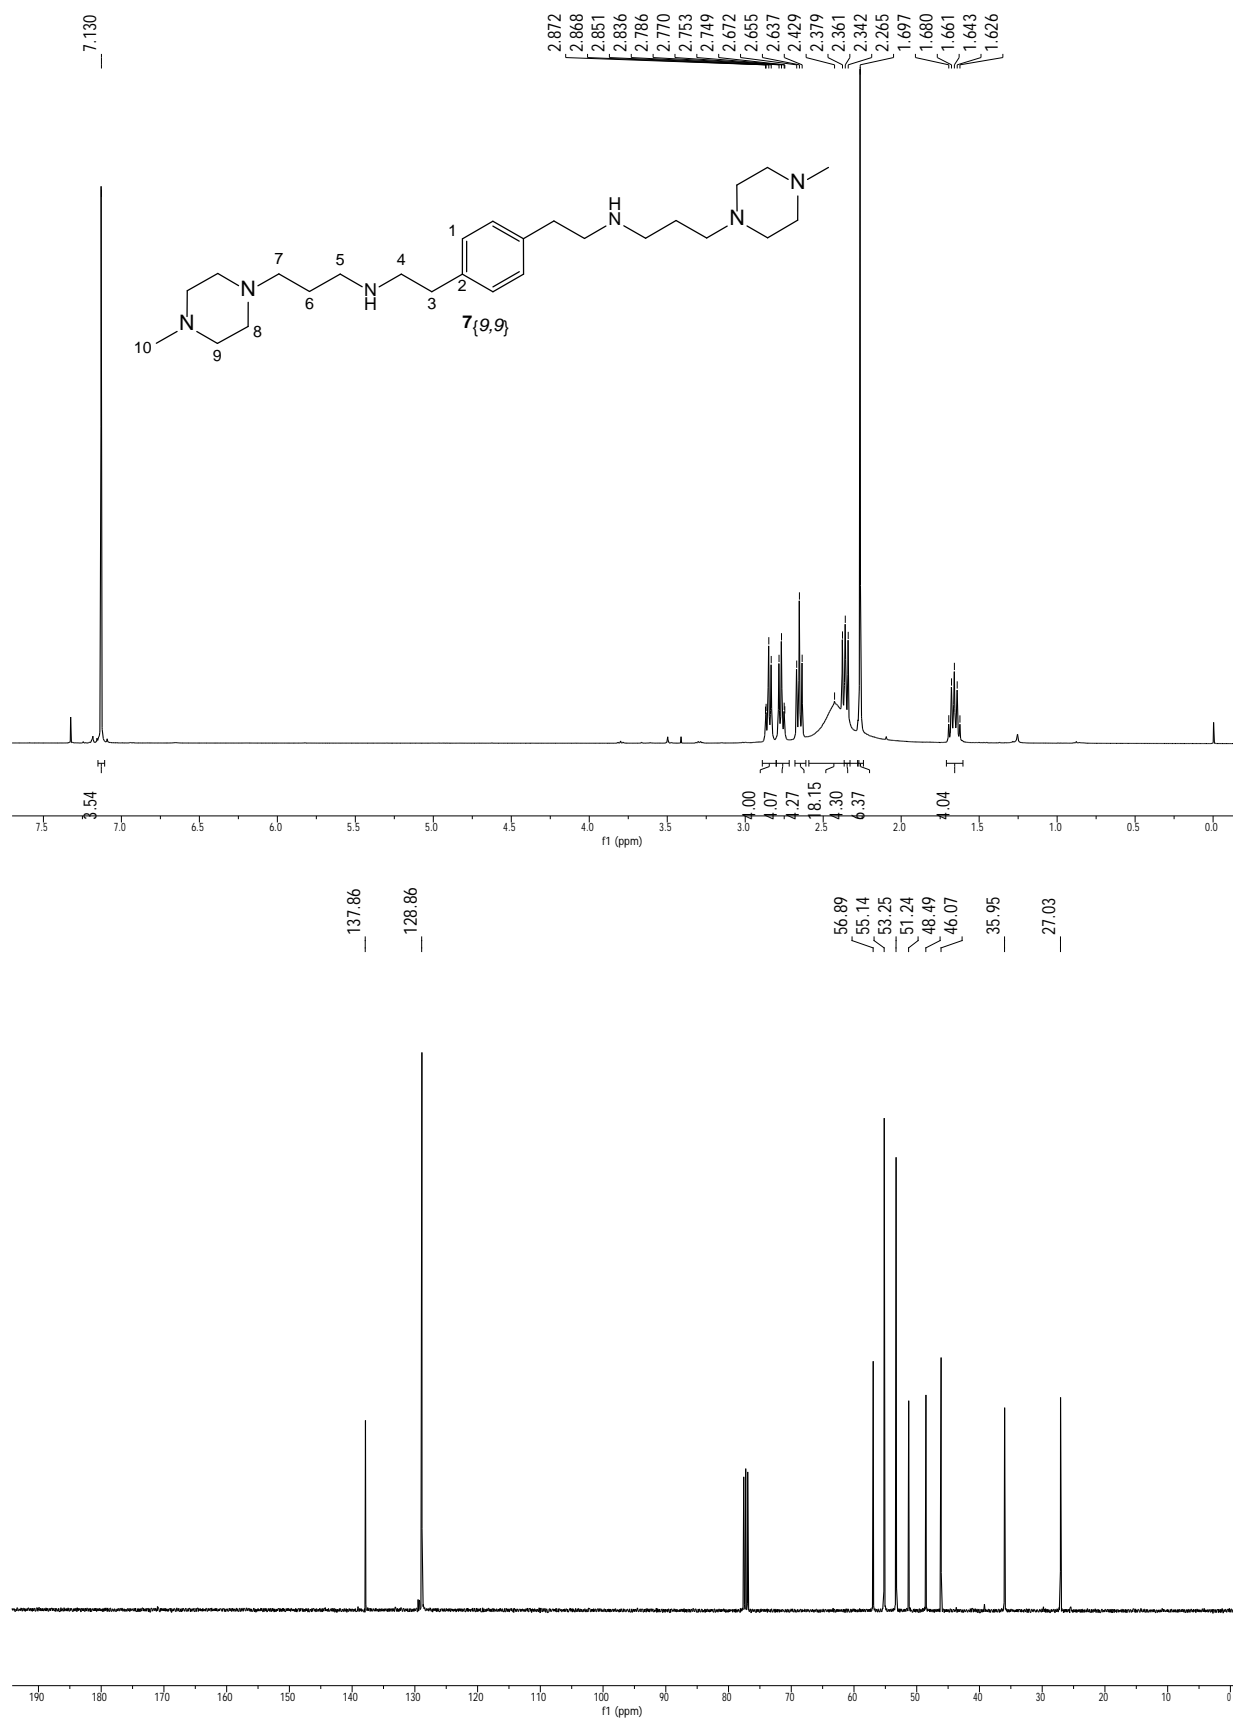

**Fig. S-18:** <sup>1</sup>H and <sup>13</sup>C-NMR of *N,N'*-bis(3-(4-methylpiperazin-1-yl)propyl)-1,4-bis(2-aminoethyl)benzene (**7{9,9}**).

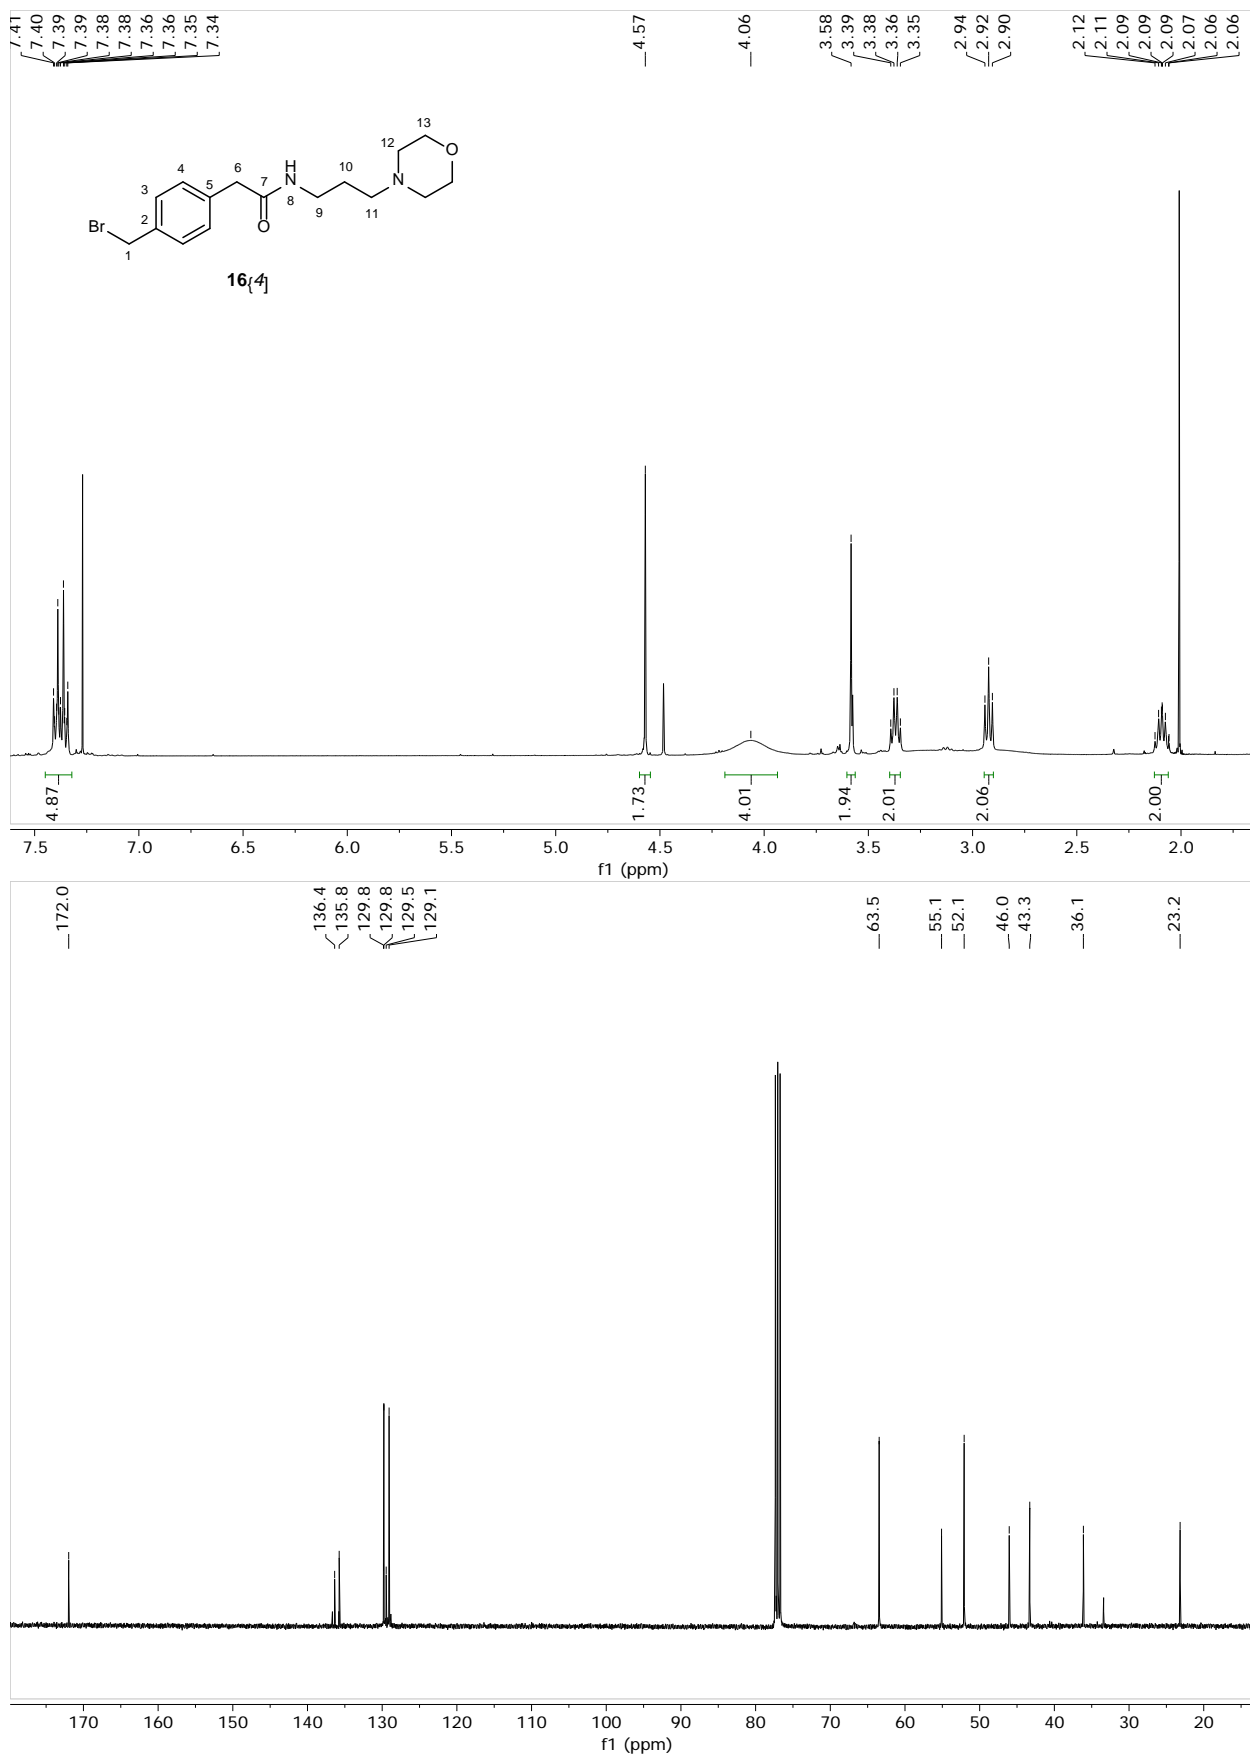

**Fig. S-19:** <sup>1</sup>H and <sup>13</sup>C-NMR of 2-(4-(bromomethyl)phenyl)-*N*-(3-morpholinopropyl)acetamide (**16{4}**).

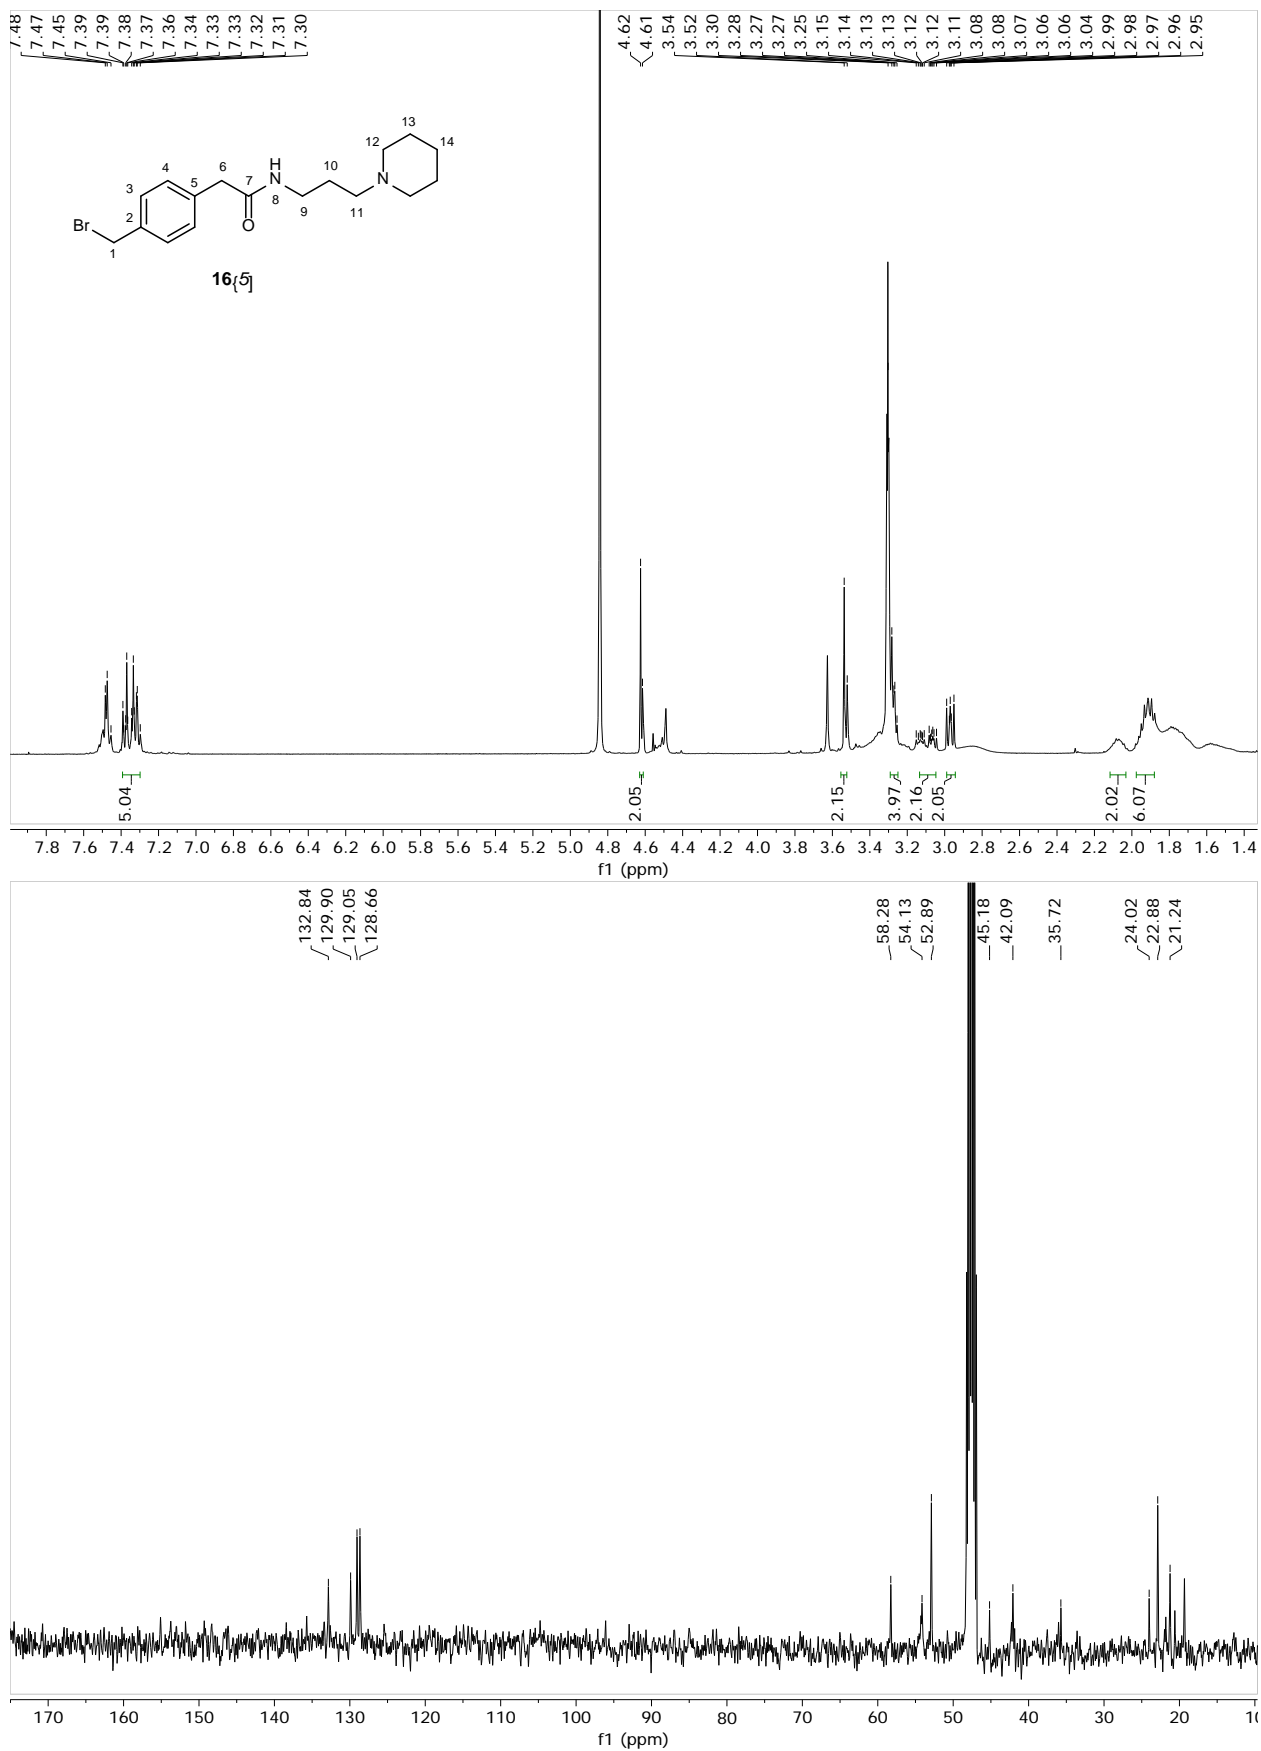

**Fig. S-21:** <sup>1</sup>H and <sup>13</sup>C-NMR of 2-(4-(bromomethyl)phenyl)-N-(3-(piperidin-1-yl)propyl)acetamide (**16{5}**).

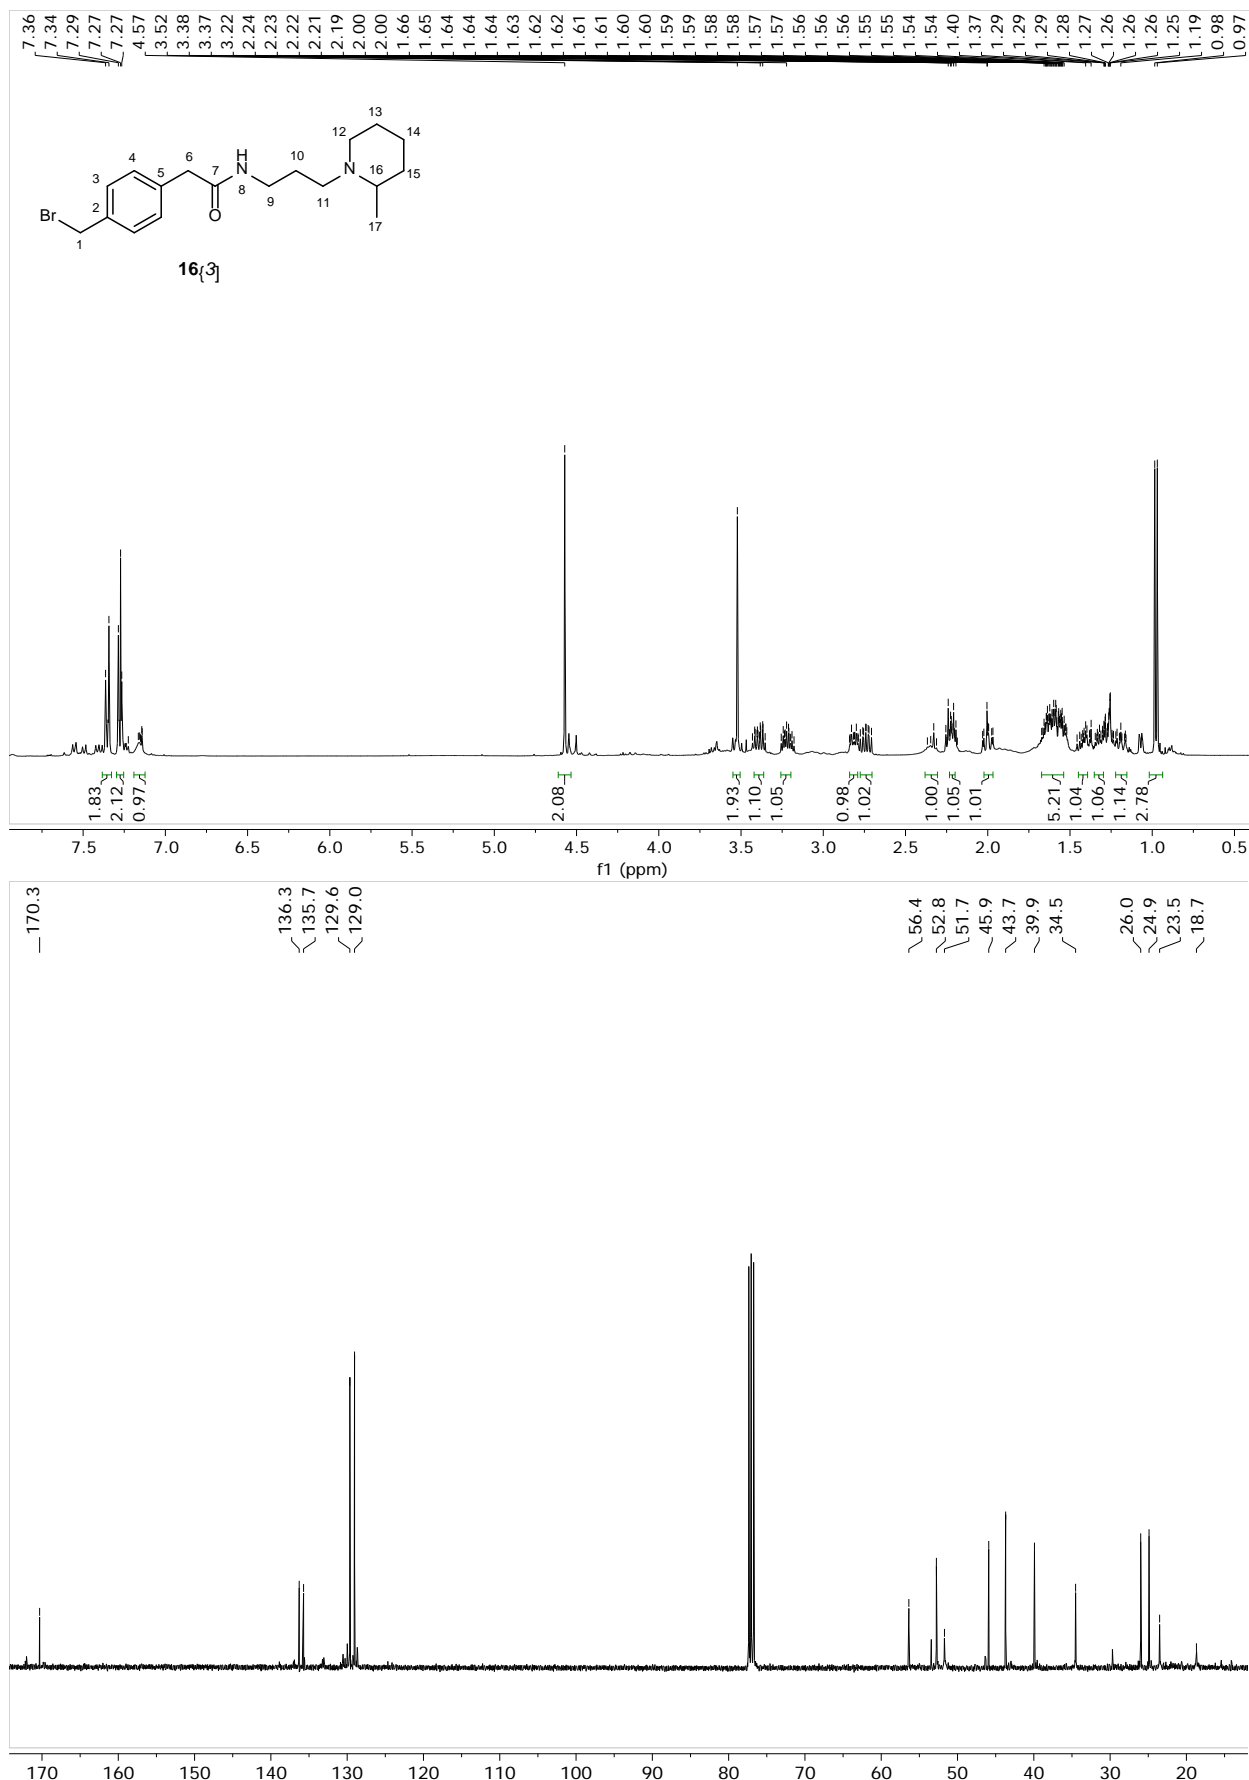

**Fig. S-22:** <sup>1</sup>H and <sup>13</sup>C-NMR of 2-(4-(bromomethyl)phenyl)-N-(3-(2-methylpiperidin-1-yl)propyl) acetamide (**16{3}**).

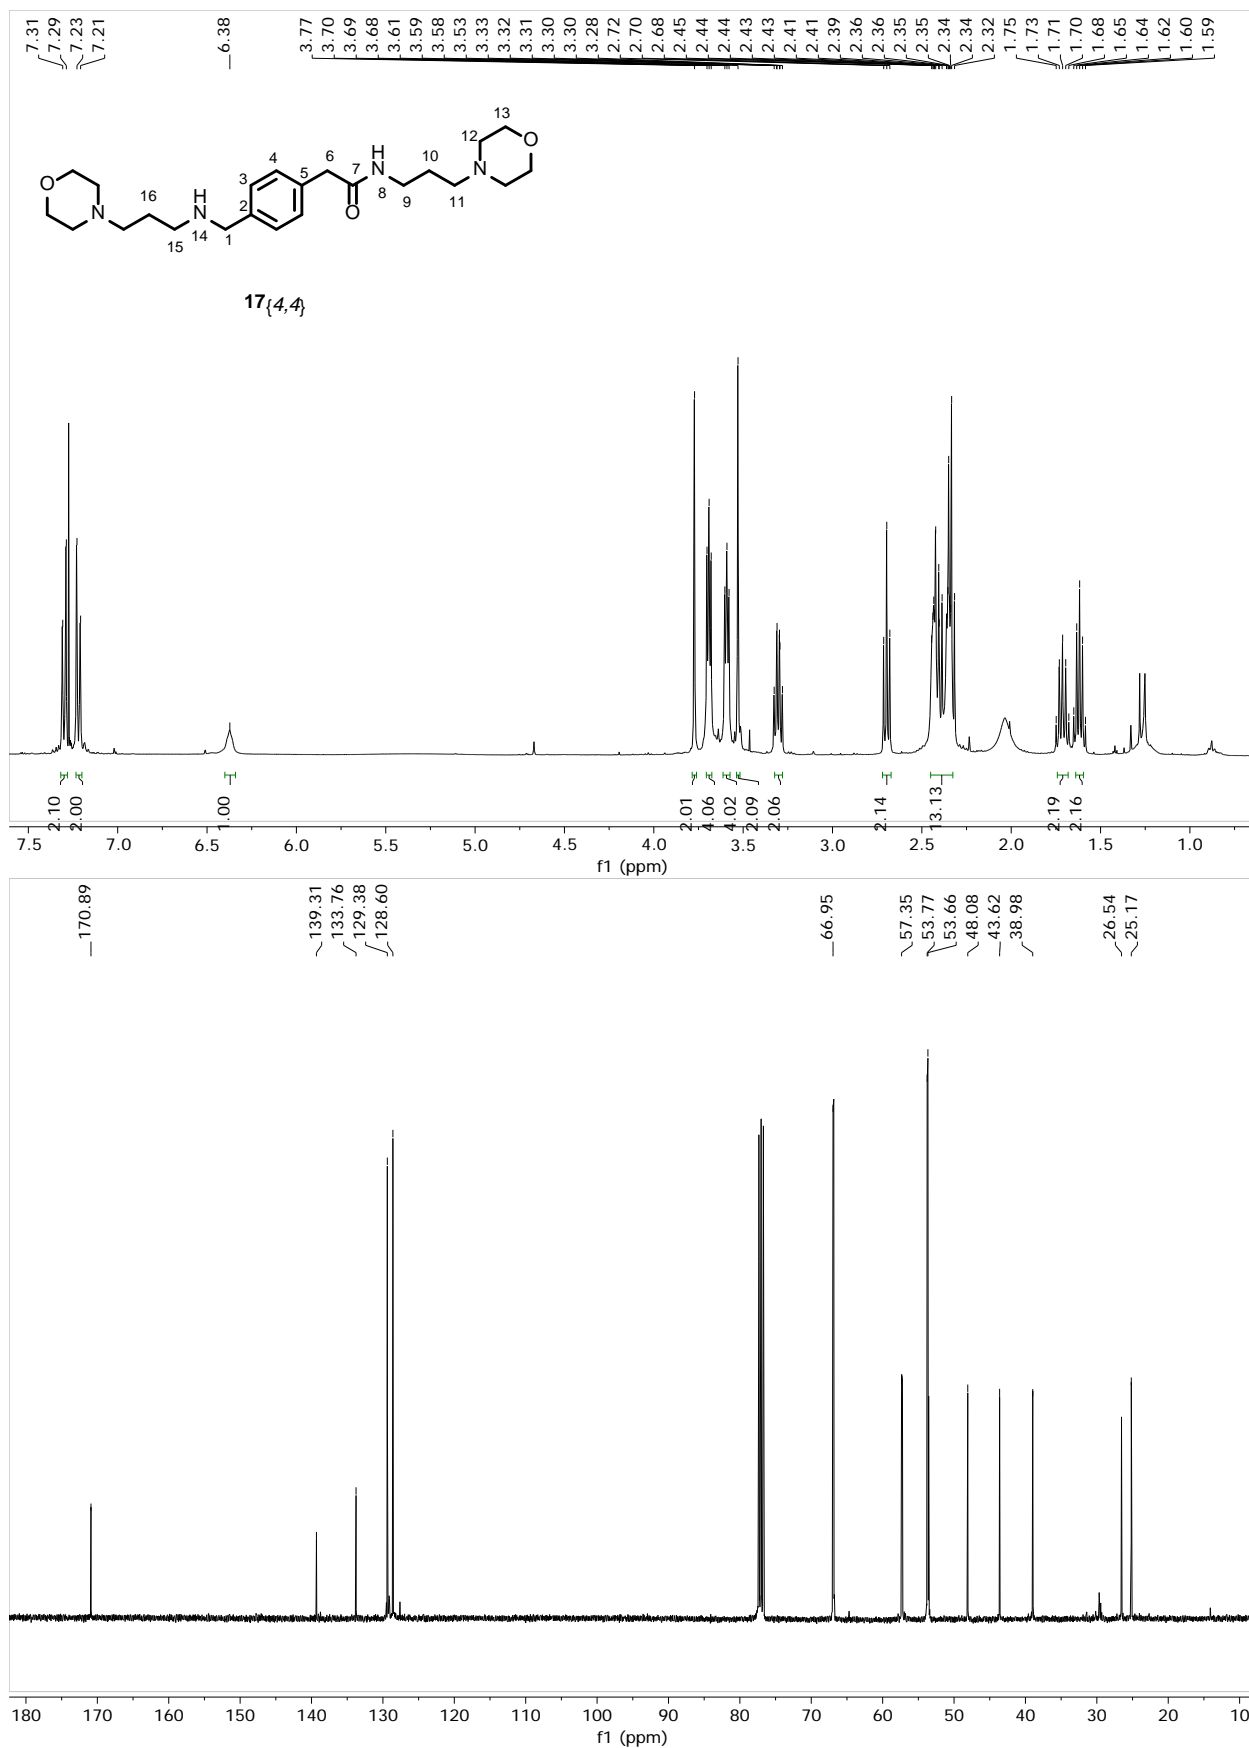

**Fig. S-23:** <sup>1</sup>H and <sup>13</sup>C-NMR of 2-(4-((3-morpholinopropylamino)methyl)phenyl)-N-(3-morpholinopropyl) acetamide (**17**{4,4}).

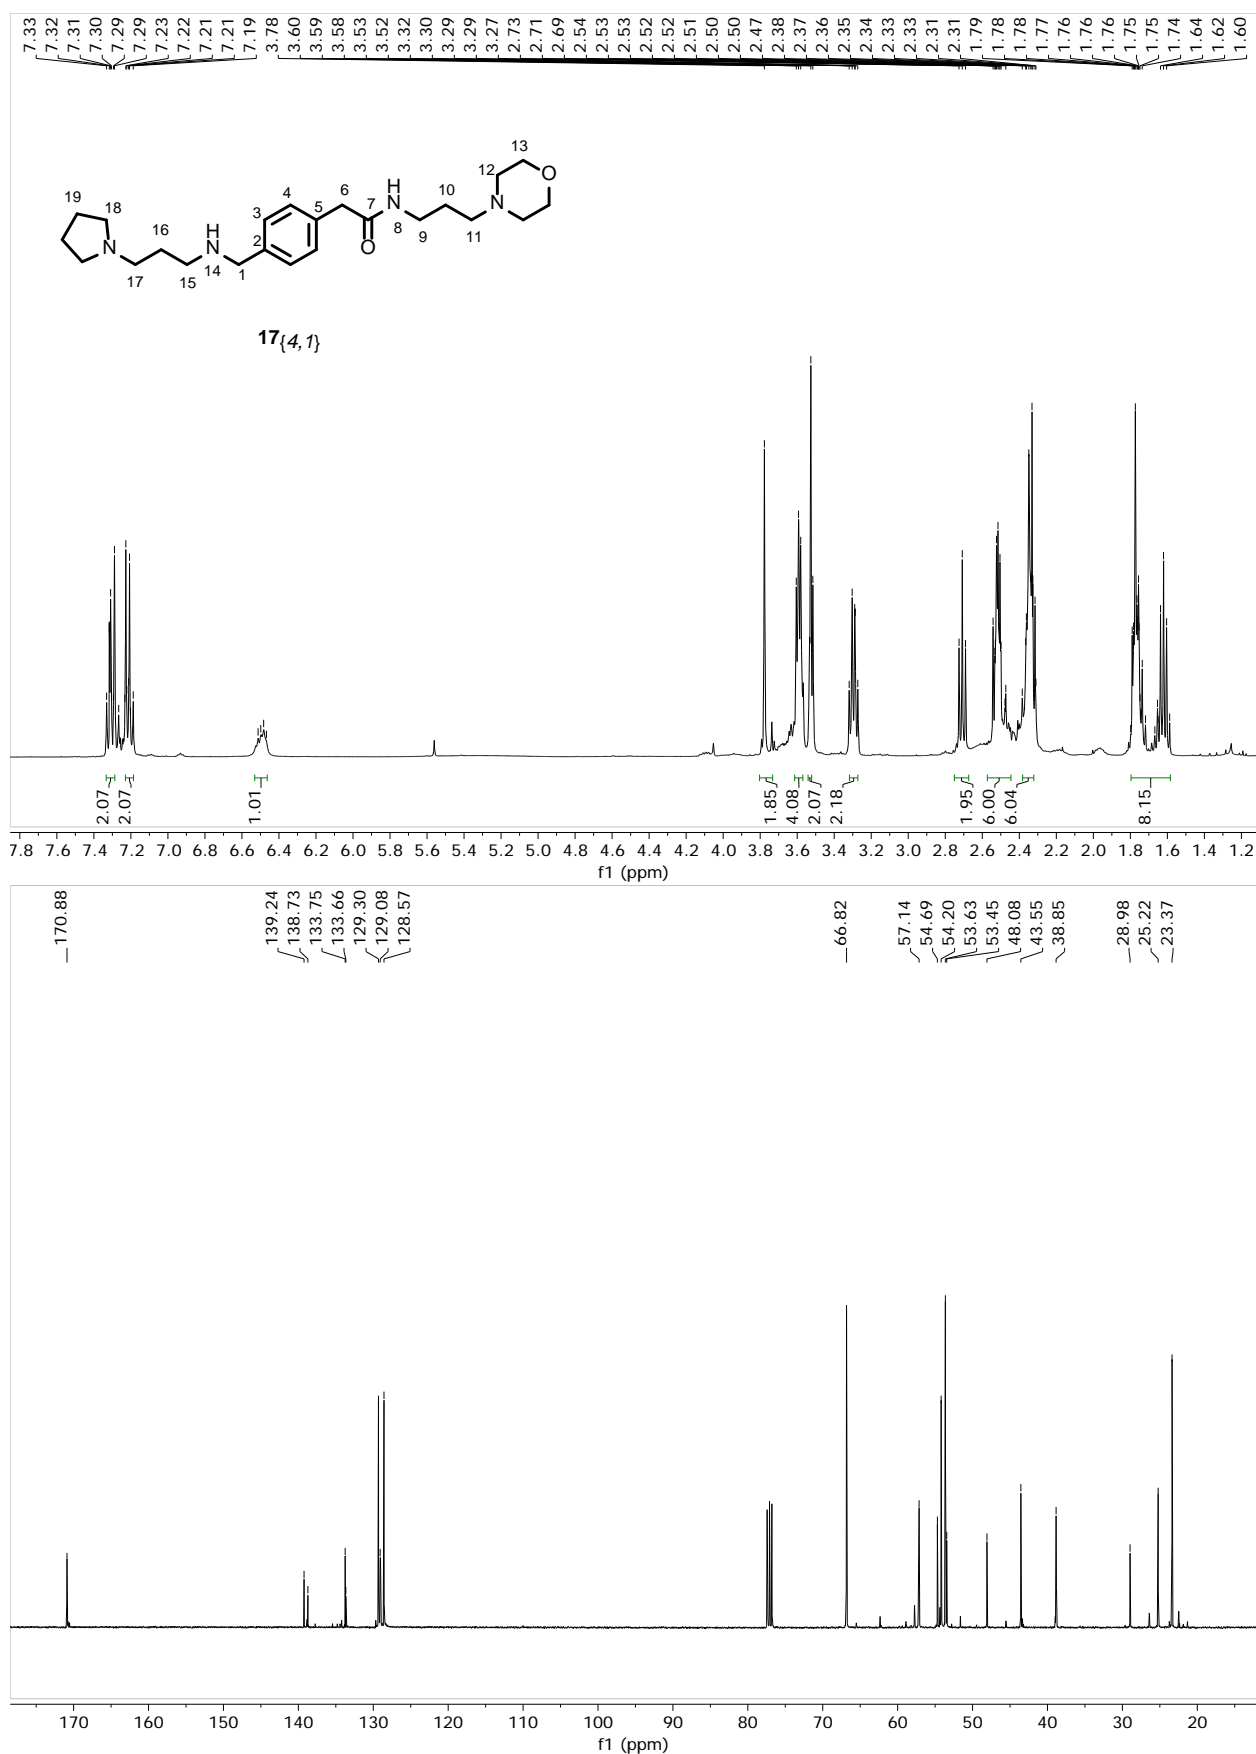

**Fig. S-24:**  $^1\text{H}$  and  $^{13}\text{C}$ -NMR of 2-(4-((3-(pyrrolidin-1-yl)propylamino)methyl)phenyl)-*N*-(3-morpholino propyl)acetamide (**17**{4,1}).



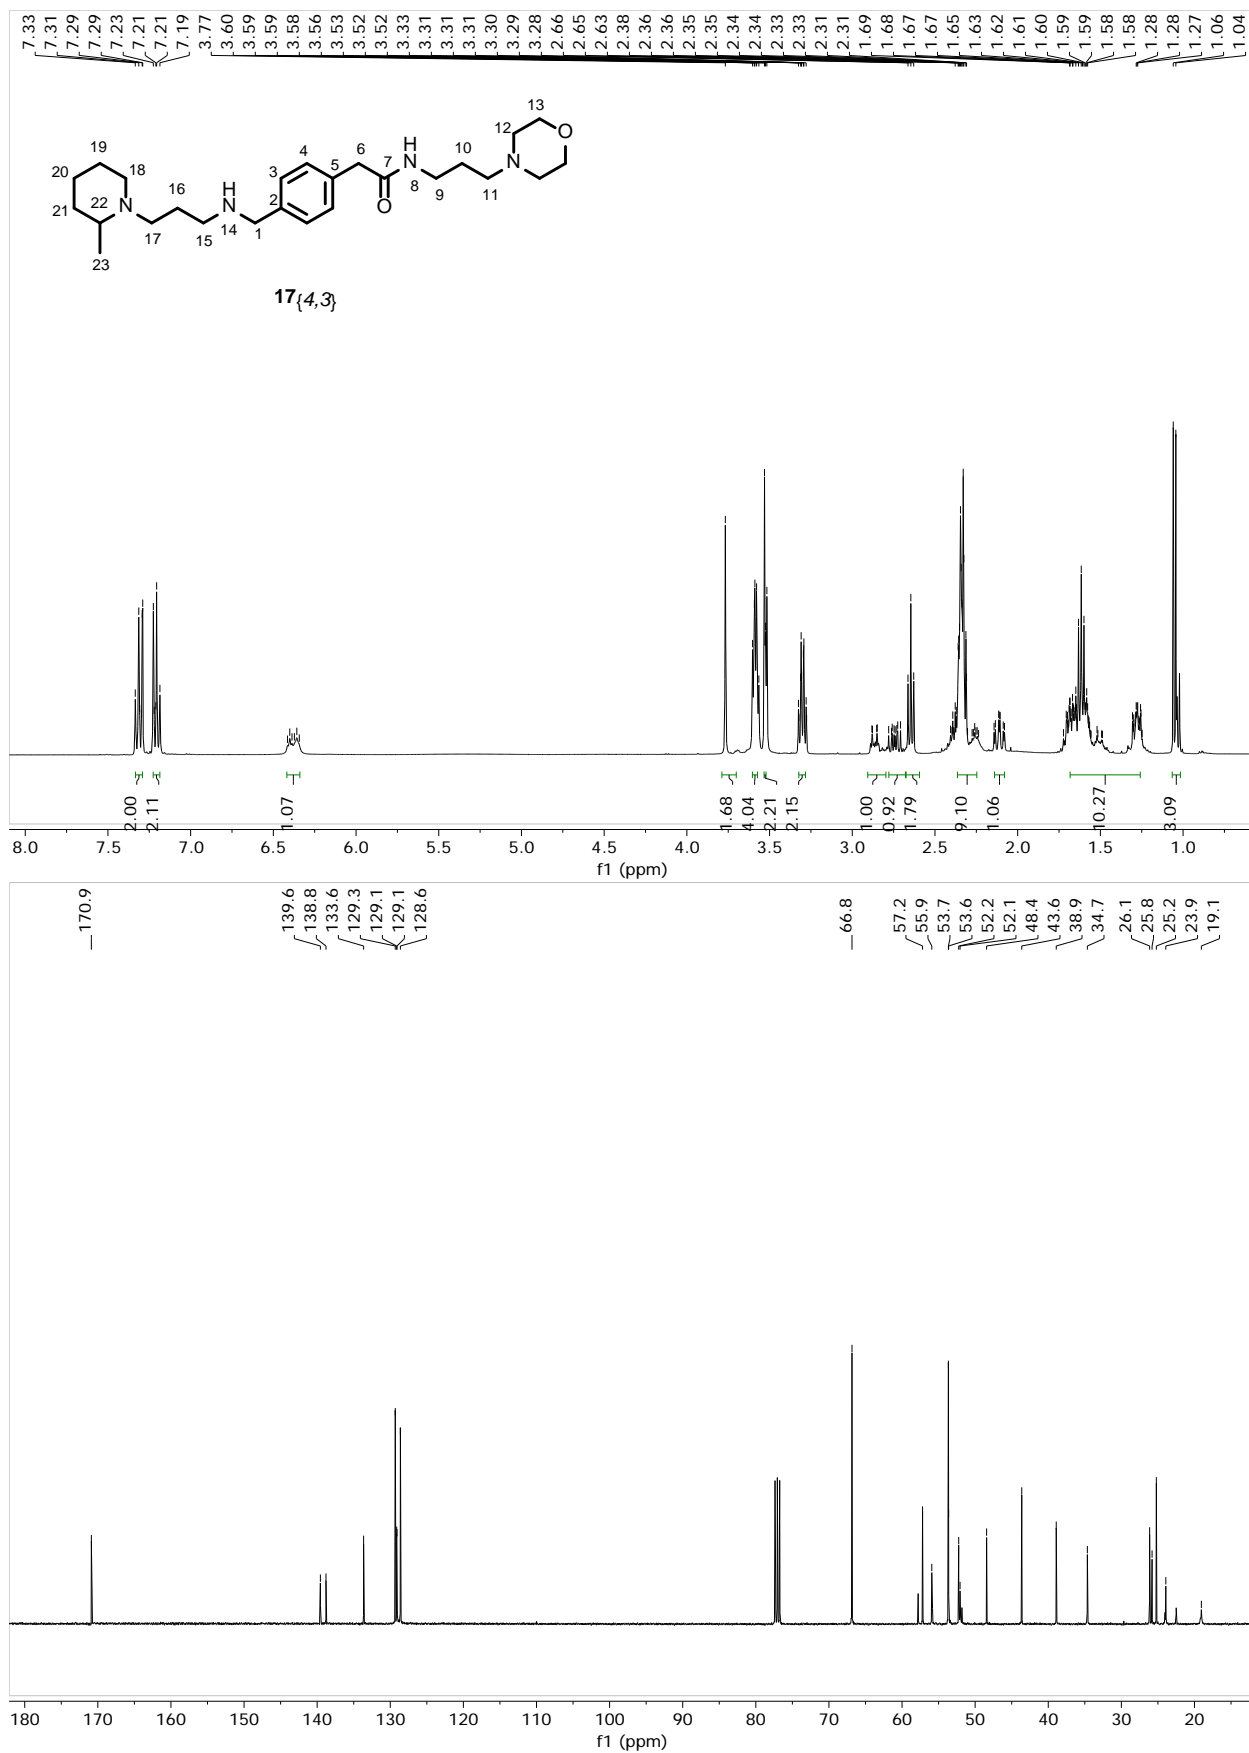

**Fig. S-25:** <sup>1</sup>H and <sup>13</sup>C-NMR of 2-(4-((3-(2-methylpiperidin-1-yl)propylamino)methyl)phenyl)-N-(3-morpholinopropyl)acetamide (**17{4,3}**).

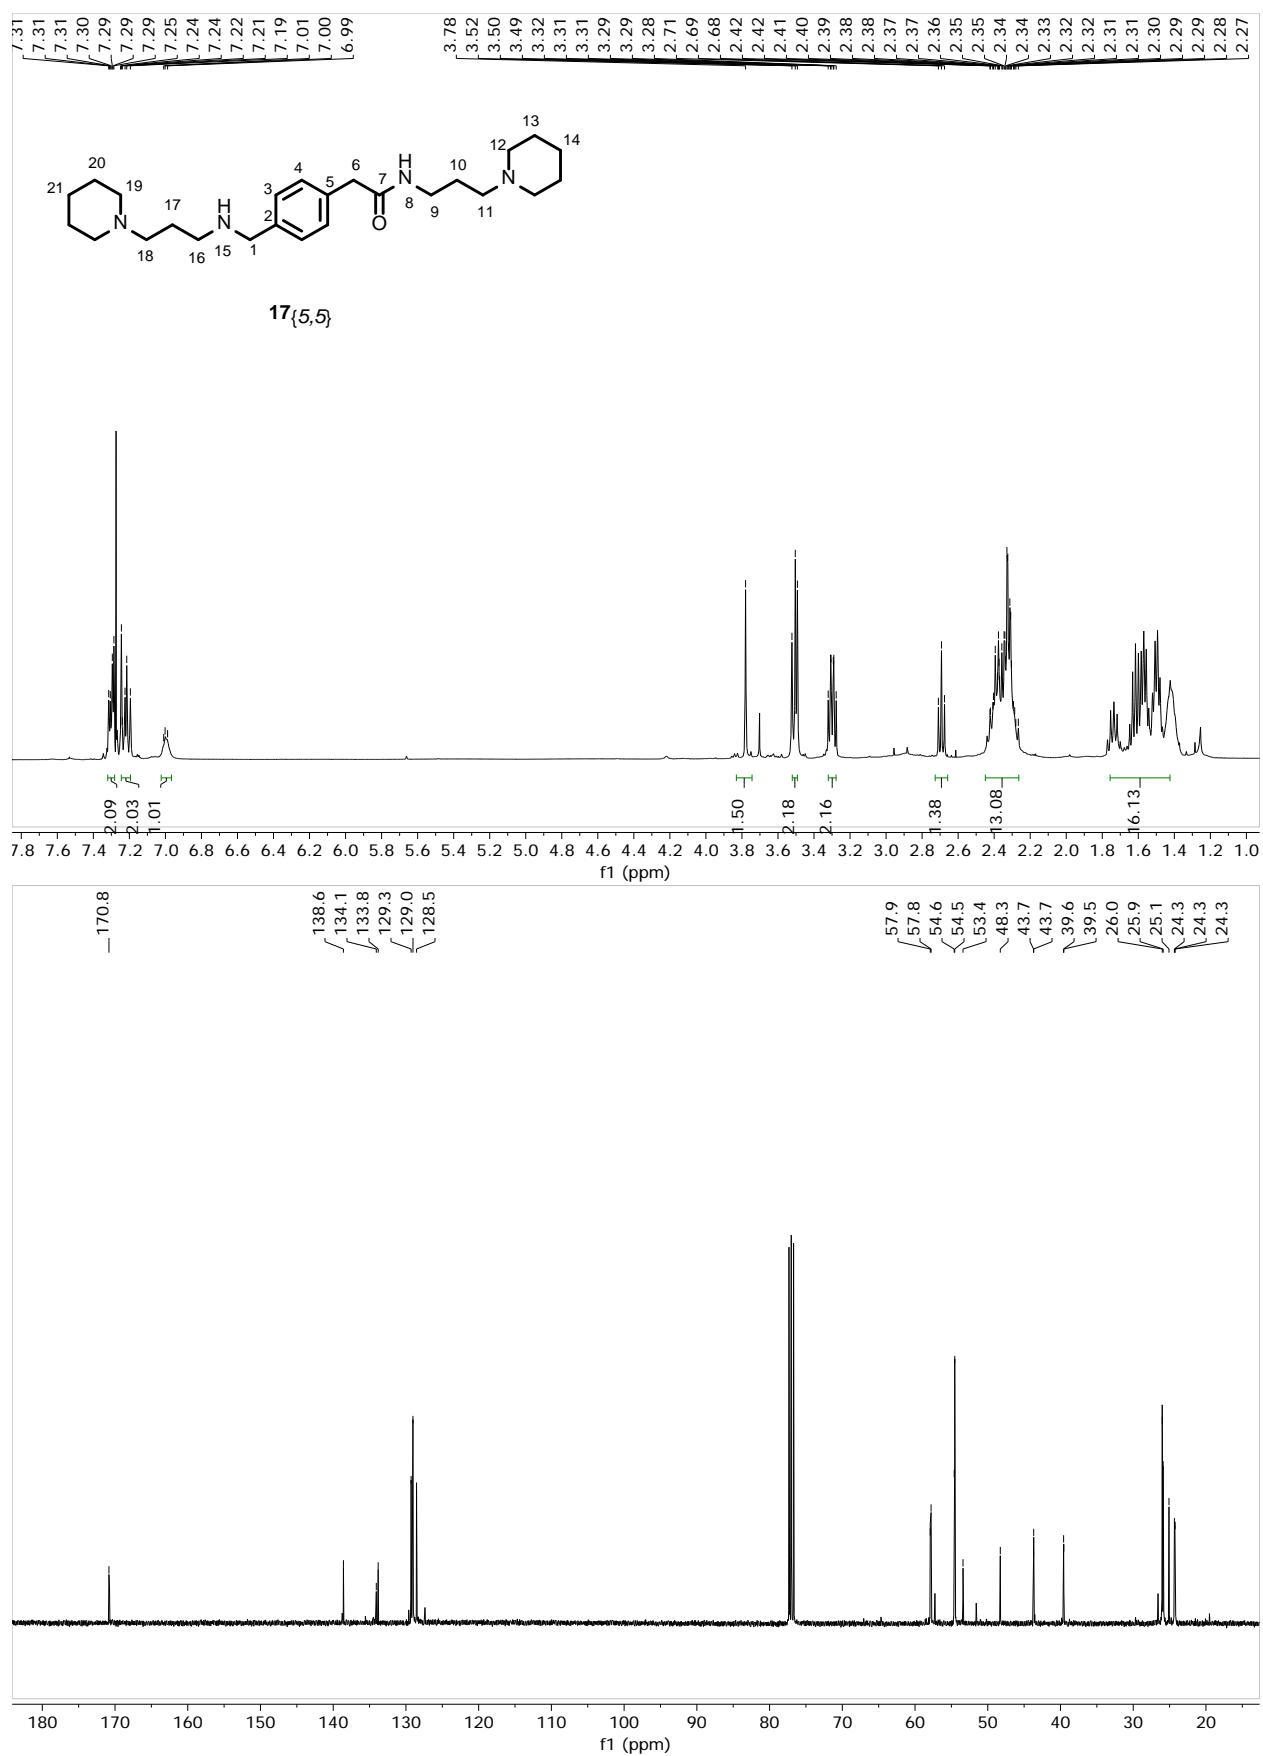

**Fig. S-26:** <sup>1</sup>H and <sup>13</sup>C-NMR of 2-(4-((3-(piperidin-1-yl)propylamino)methyl)phenyl)-N-(3-(piperidin-1-yl)propyl)acetamide (17{5,5}).

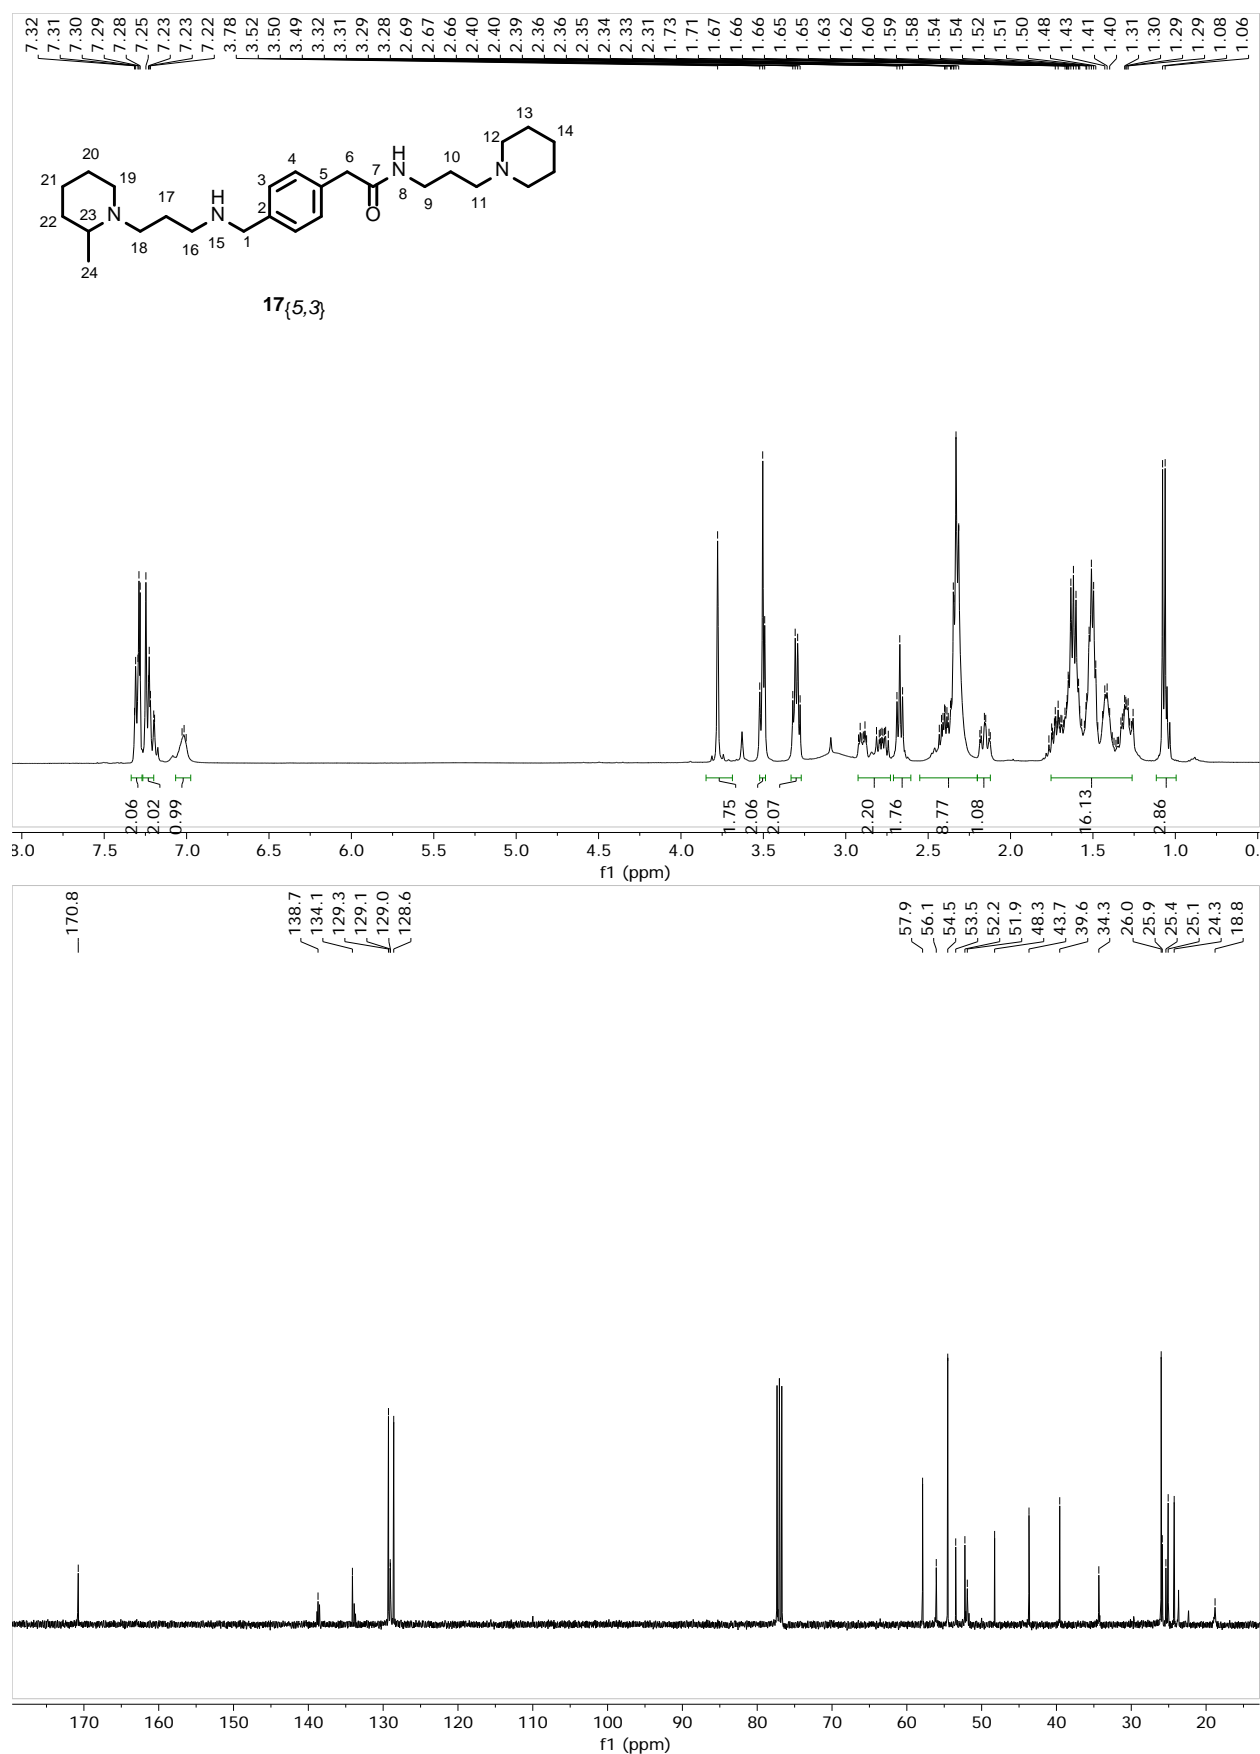

**Fig. S-27:** <sup>1</sup>H and <sup>13</sup>C-NMR of 2-(4-((3-(2-methylpiperidin-1-yl)propylamino)methyl)phenyl)-N-(3-(piperidin-1-yl)propyl)acetamide (**17{5,3}**).

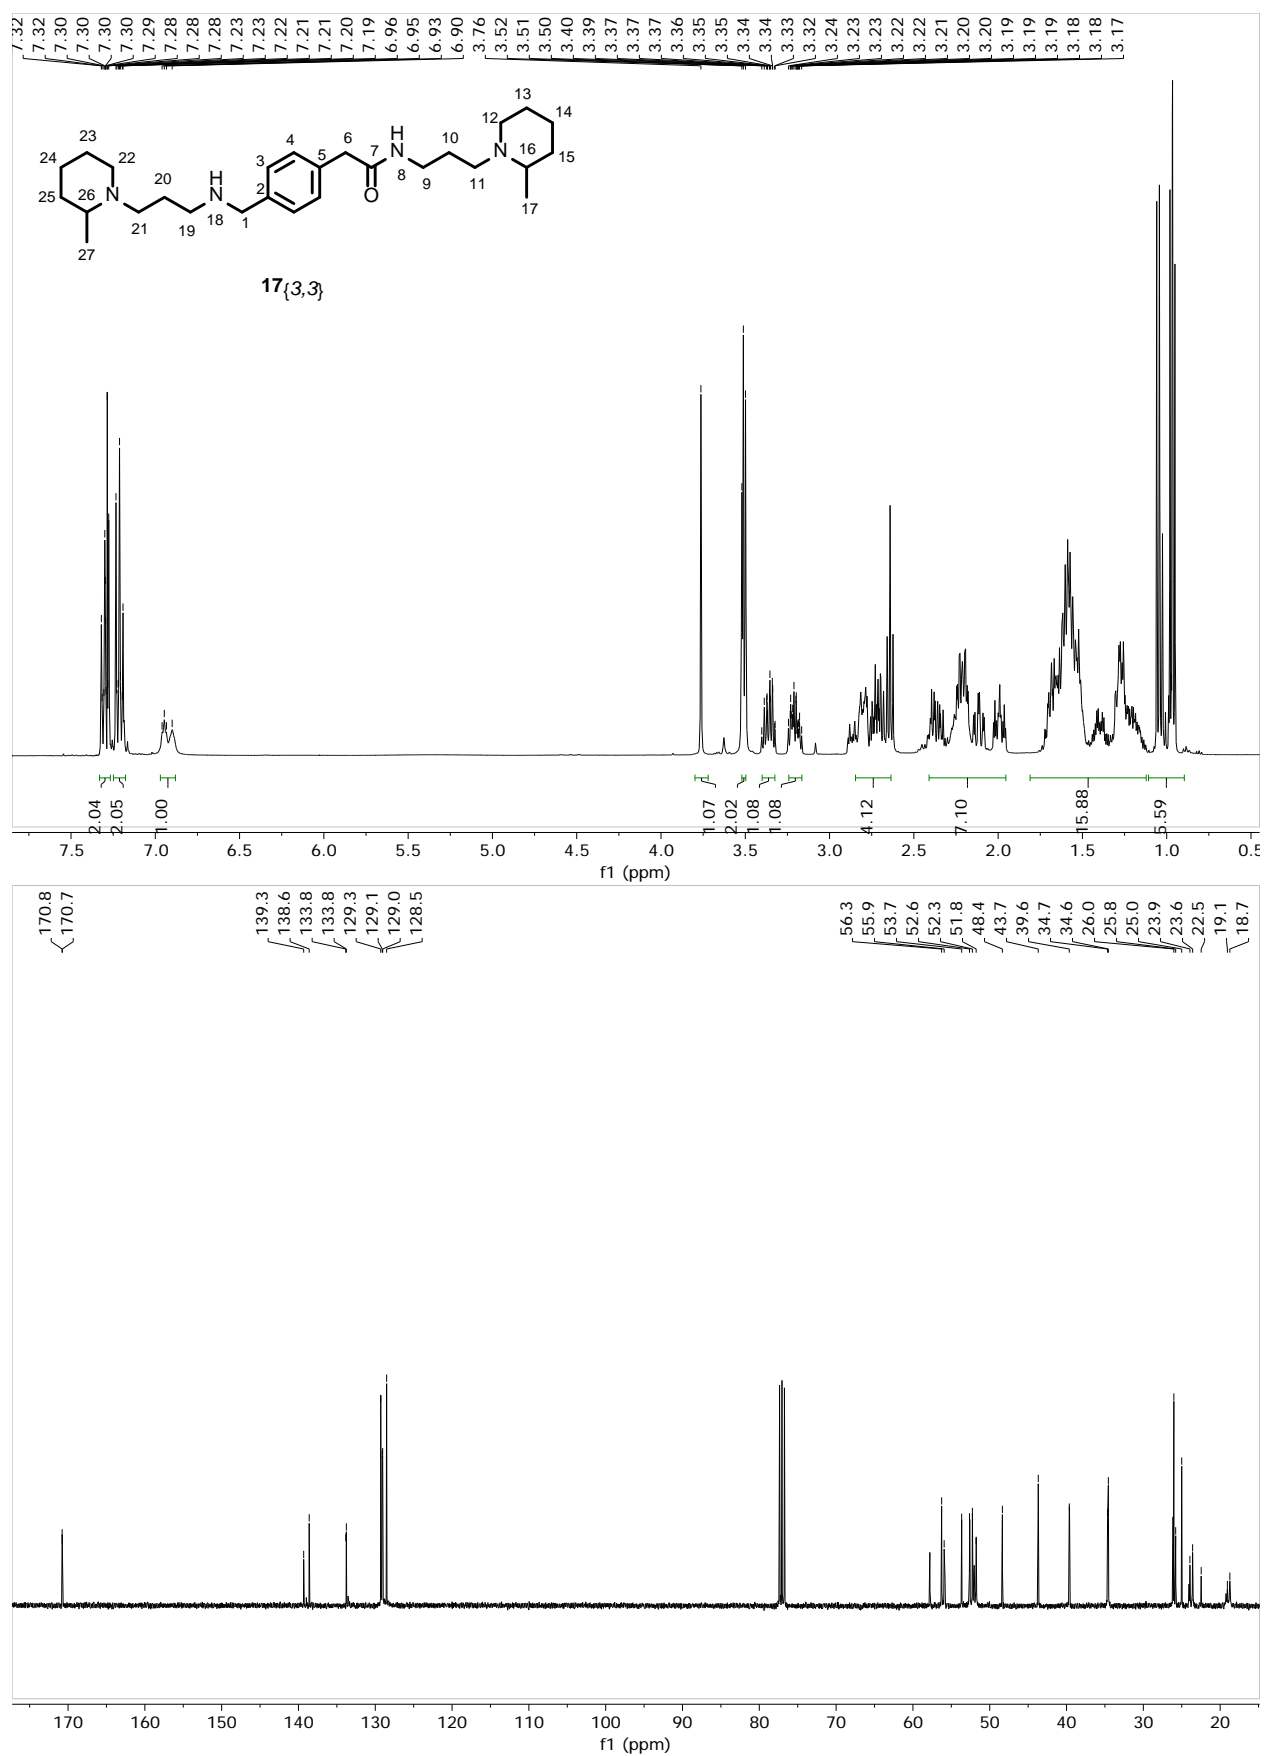

**Fig. S-28:** <sup>1</sup>H and <sup>13</sup>C-NMR of 2-(4-((3-(2-methylpiperidin-1-yl)propylamino)methyl)phenyl)-N-(3-(2-methylpiperidin-1-yl)propyl)acetamide (**17(3,3)**).

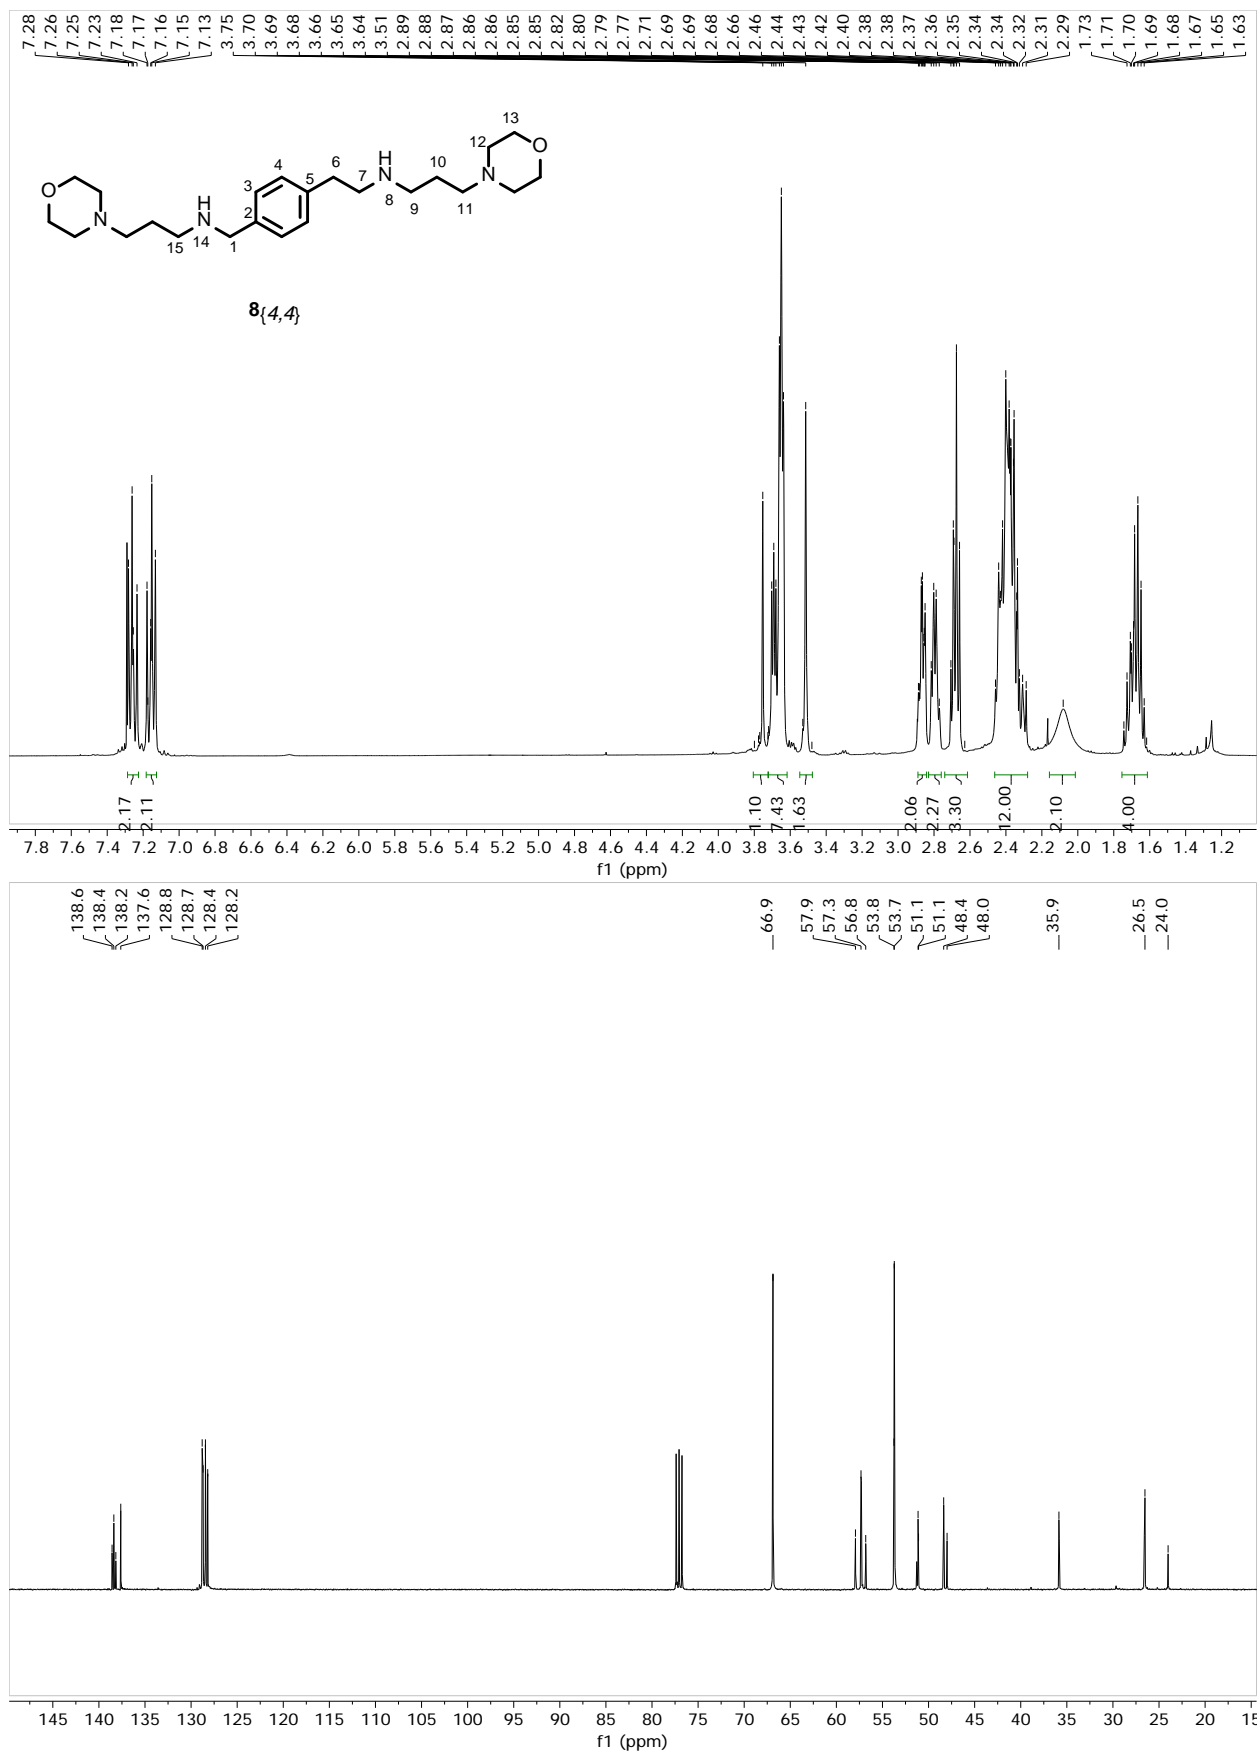

**Fig. S-29:** <sup>1</sup>H and <sup>13</sup>C-NMR of *N*-(4-(2-(3-morpholinopropylamino)ethyl)benzyl)-3-morpholinopropan-1-amine (**8**{4,4}).

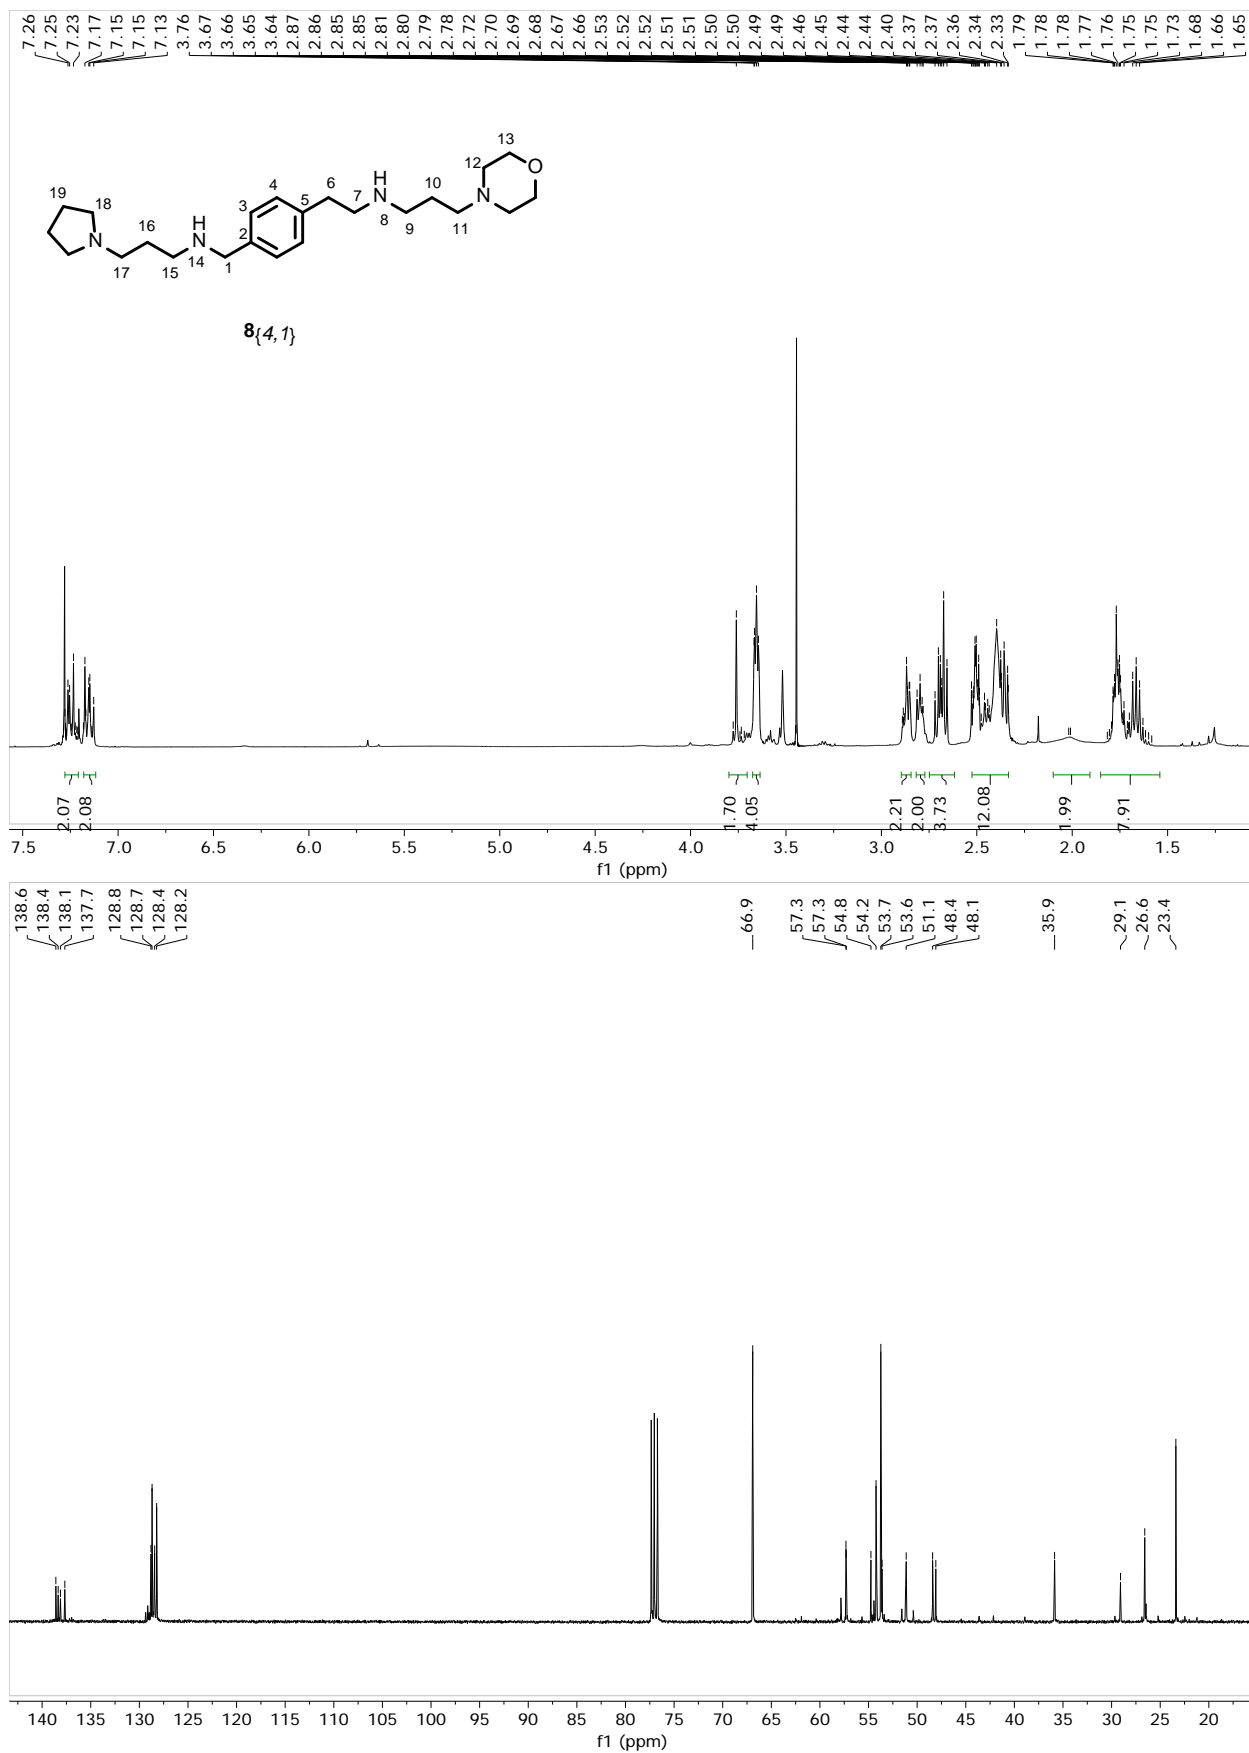

**Fig. S-30:**  $^1\text{H}$  and  $^{13}\text{C}$ -NMR of *N*-(4-(2-(3-morpholinopropylamino)ethyl)benzyl)-3-(pyrrolidin-1-yl)propan-1-amine (**8{4,1}**).



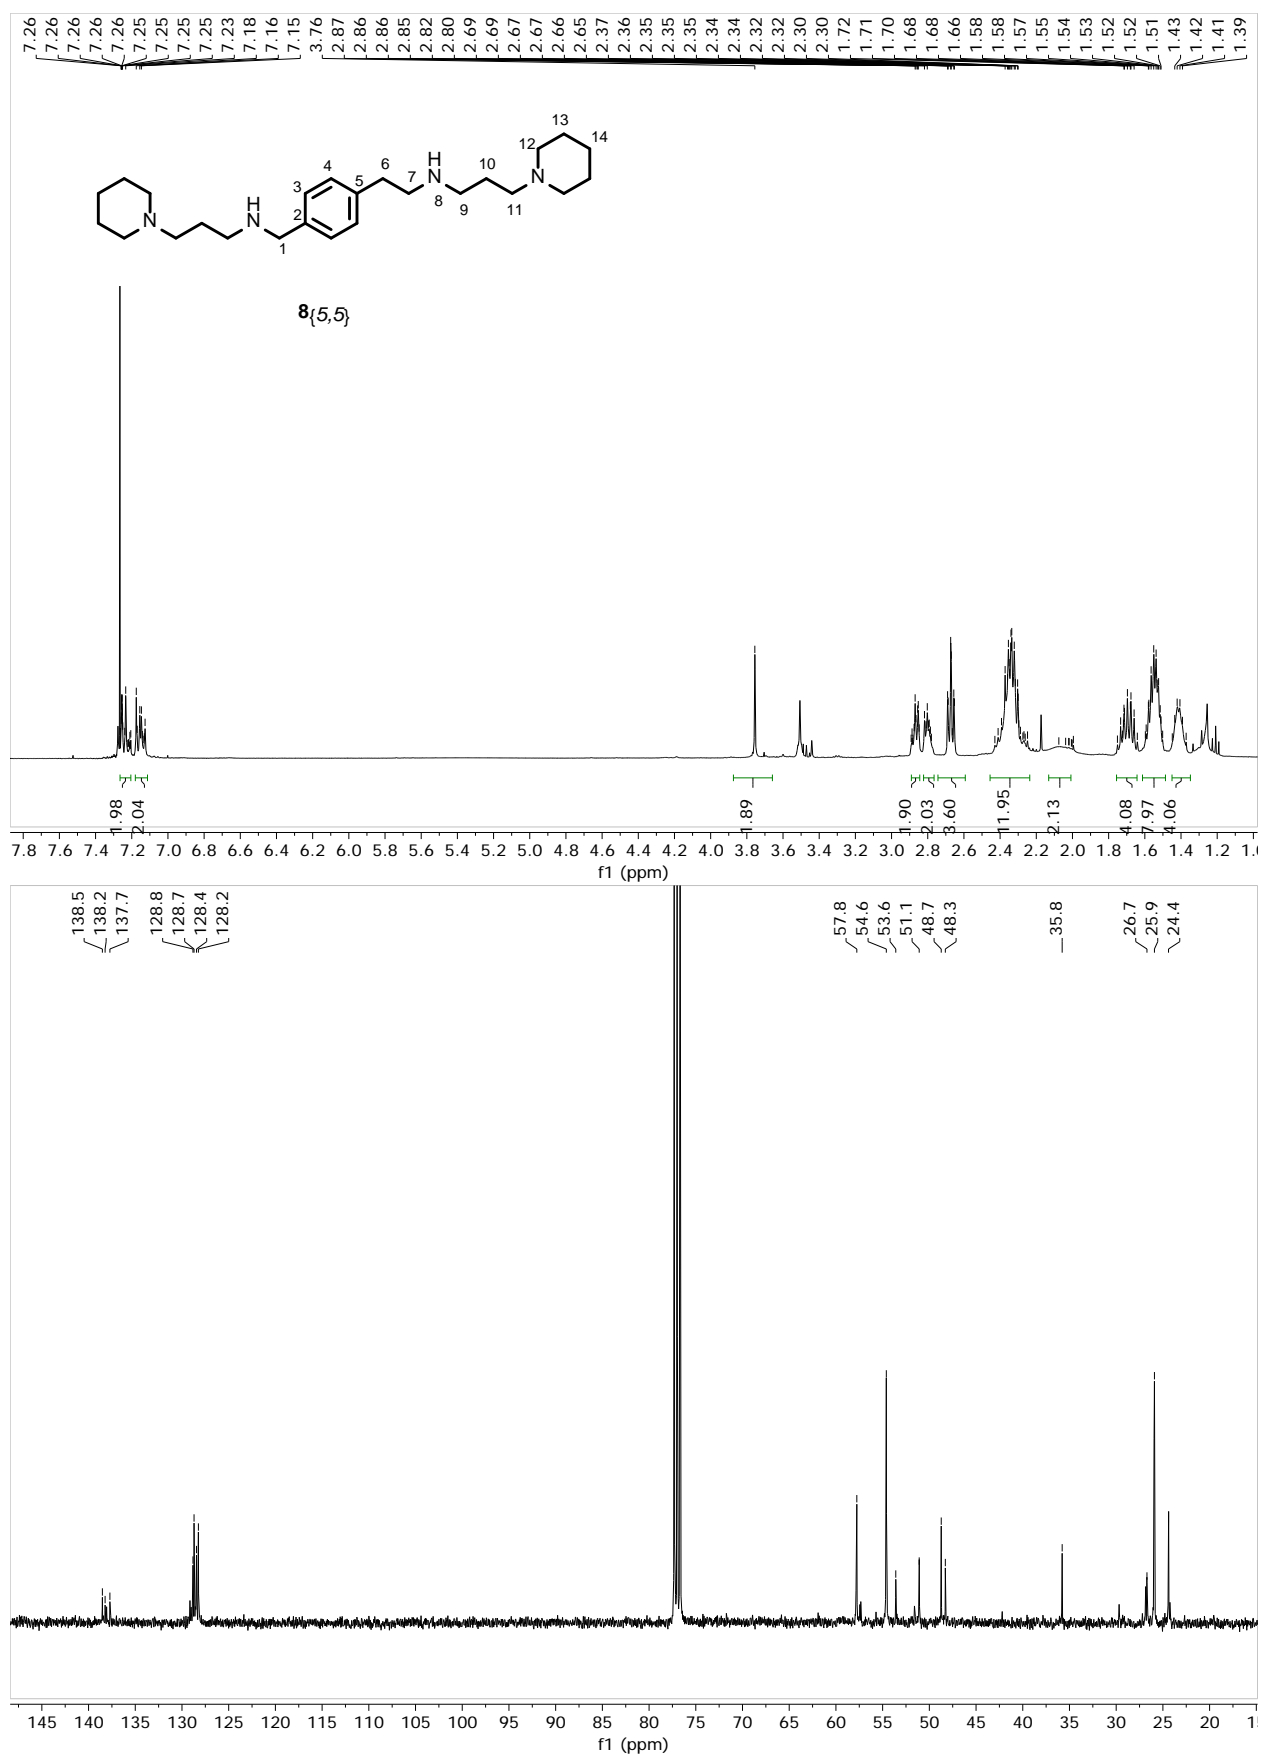

**Fig. S-32:** <sup>1</sup>H and <sup>13</sup>C-NMR of *N*-(4-(2-(3-(piperidin-1-yl)propylamino)ethyl)benzyl)-3-(piperidin-1-yl)propan-1-amine (**8{5,5}**).



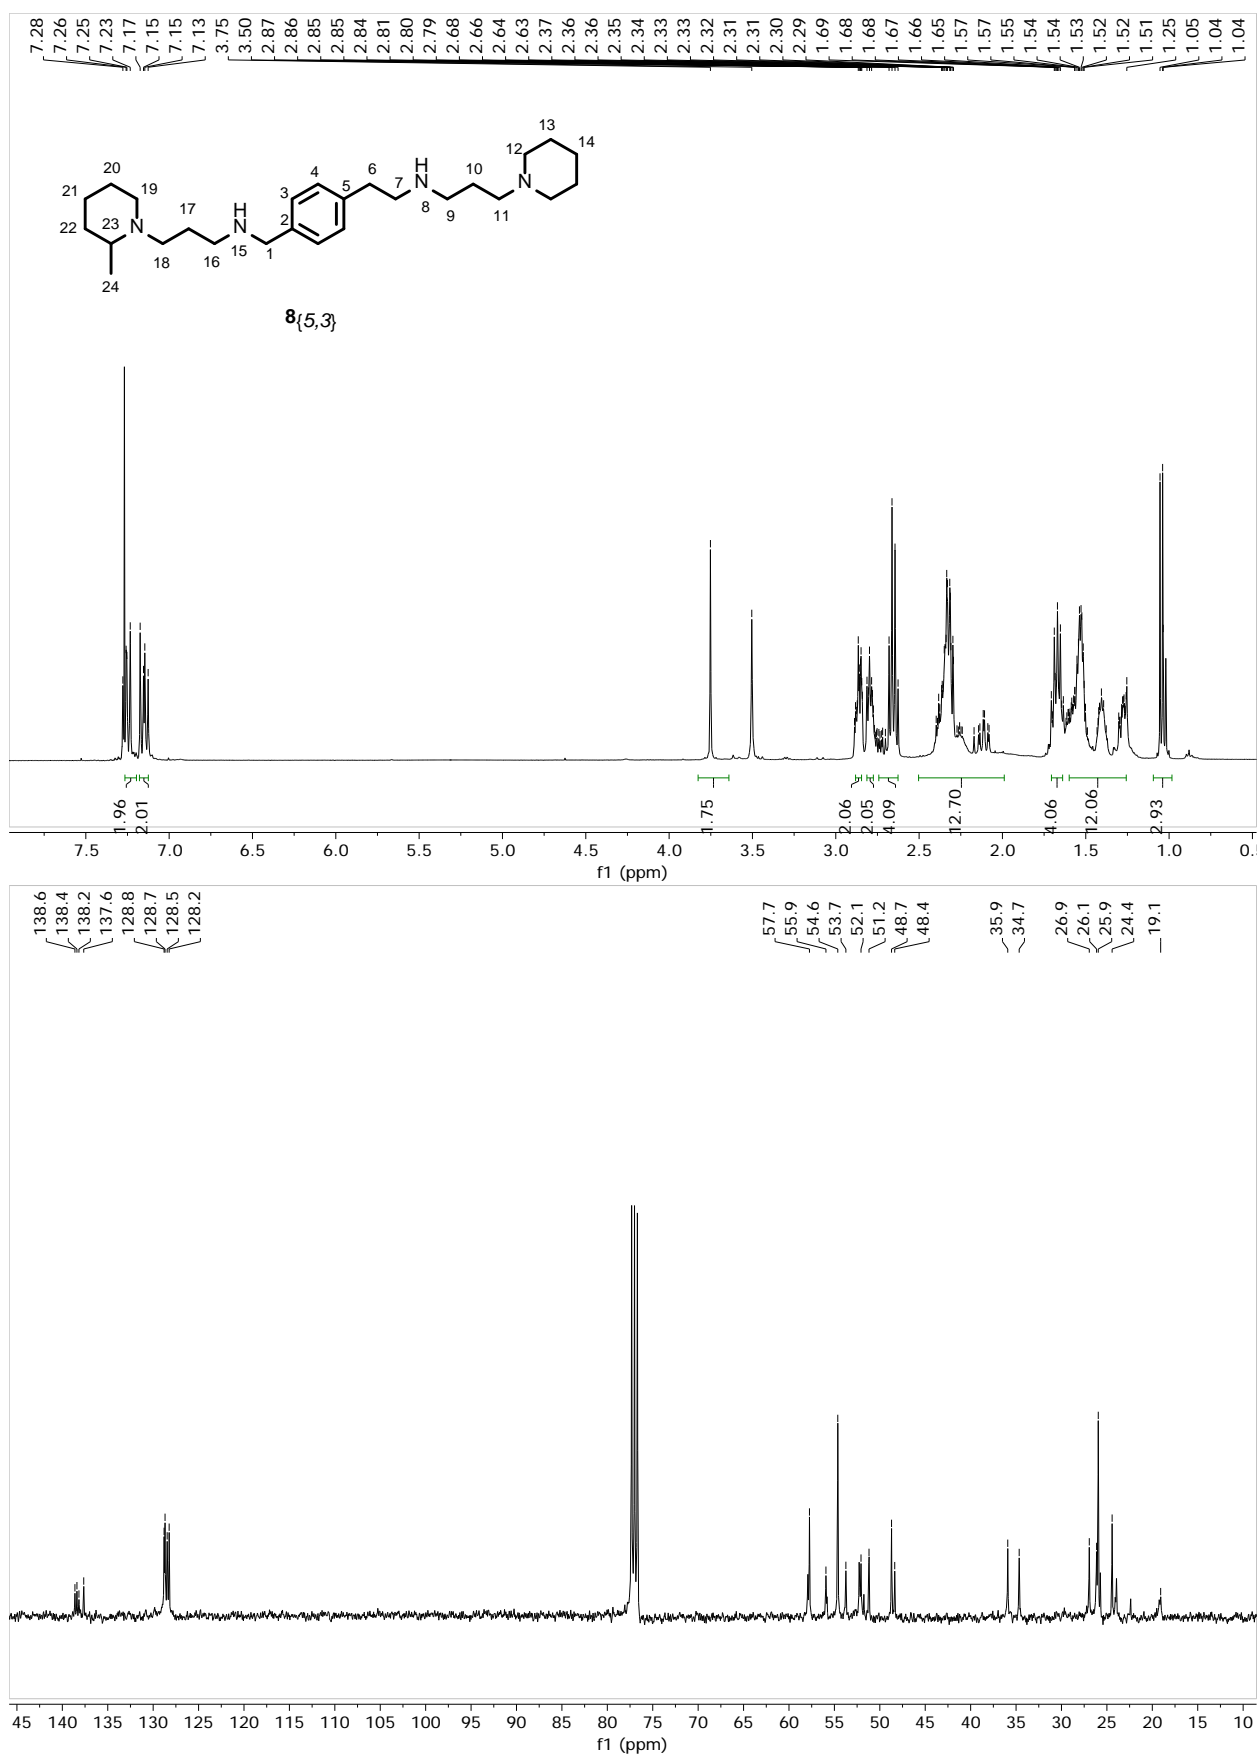

**Fig. S-33:** <sup>1</sup>H and <sup>13</sup>C-NMR of *N*-(4-(2-(3-(piperidin-1-yl)propylamino)ethyl)benzyl)-3-(2-methyl piperidin-1-yl)propan-1-amine (**8**{5,3}).

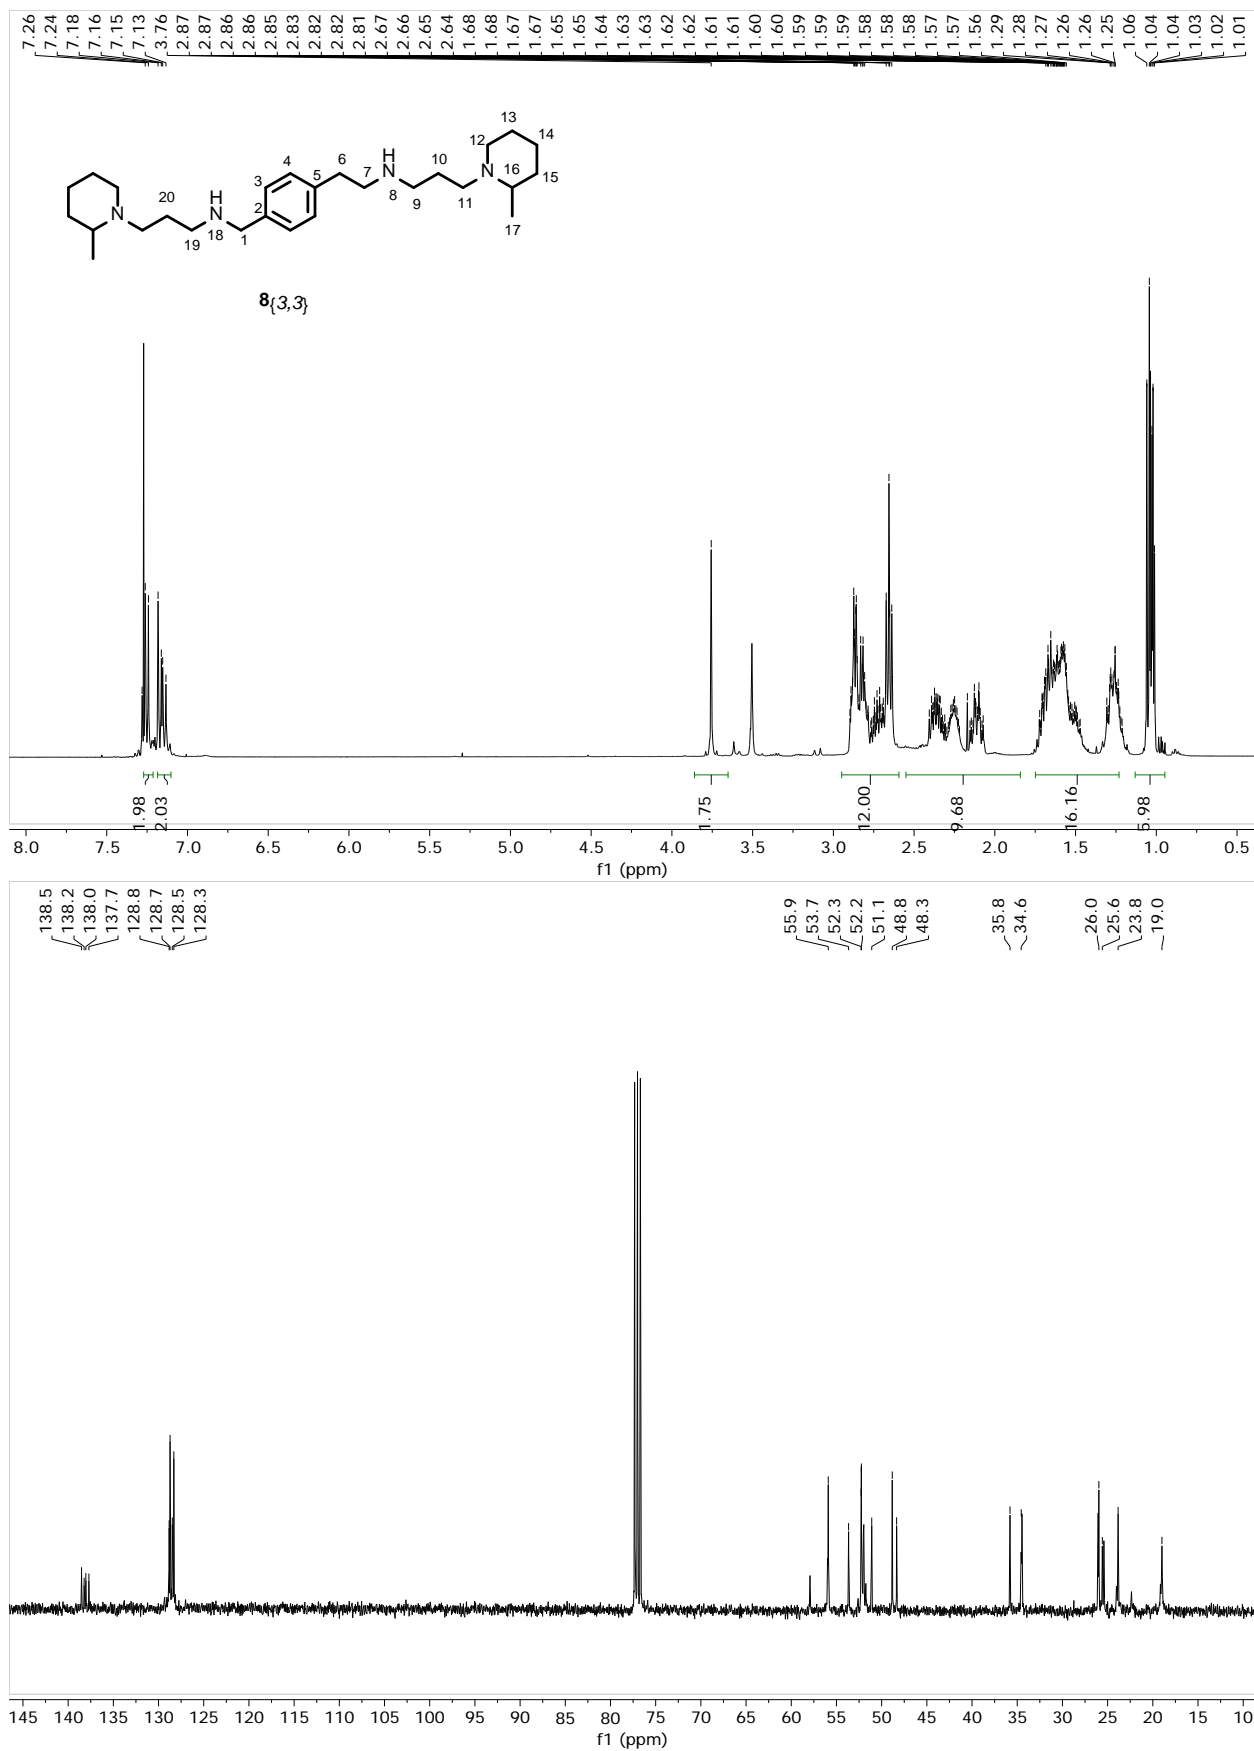

**Fig. S-34:** <sup>1</sup>H and <sup>13</sup>C-NMR of *N*-(4-(2-(3-(2-methylpiperidin-1-yl)propylamino)ethyl)benzyl)-3-(2-methylpiperidin-1-yl)propan-1-amine (**8{3,3}**).
